# Supplementary material for: A post-ingestive amino acid sensor promotes food consumption in Drosophila
Source: PubMed Central journal article supplement (PMC6170445; doi:10.1038/s41422-018-0084-9), 2018-09-12

**File S1. Scattered plots.**

The scattered plots for all figures in the manuscript.

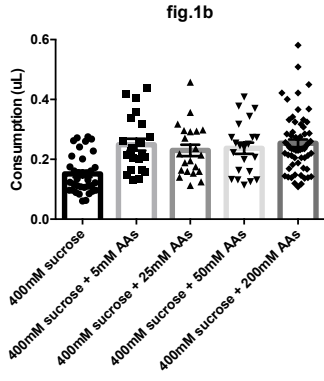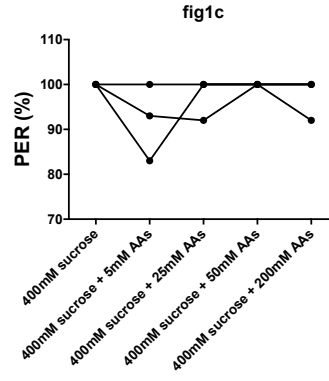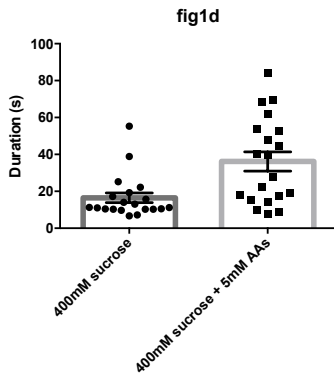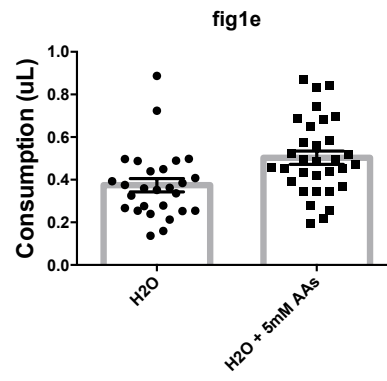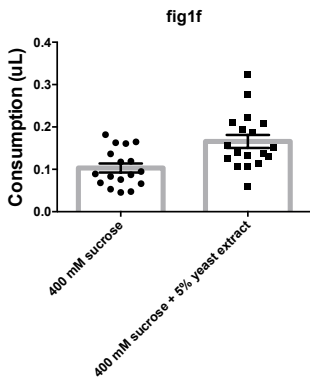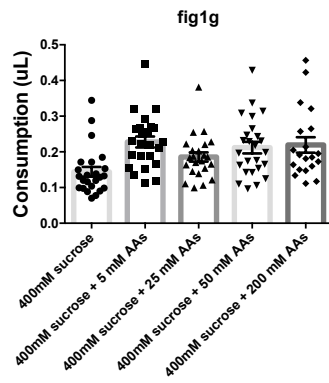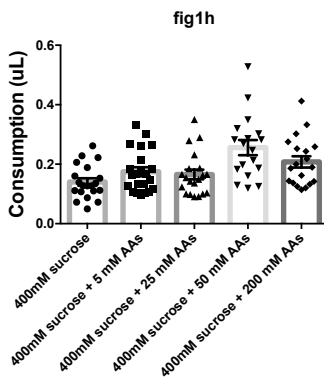

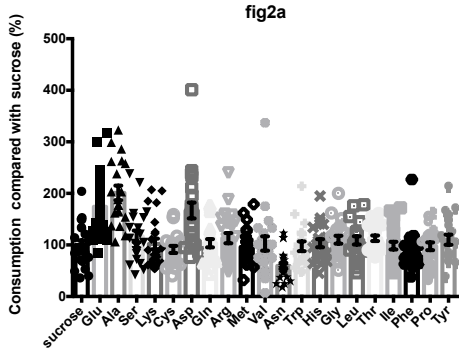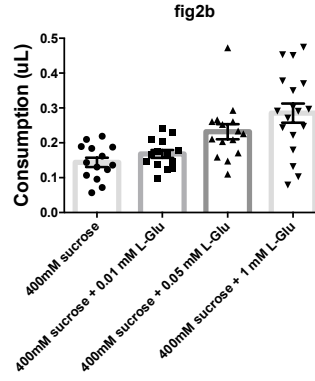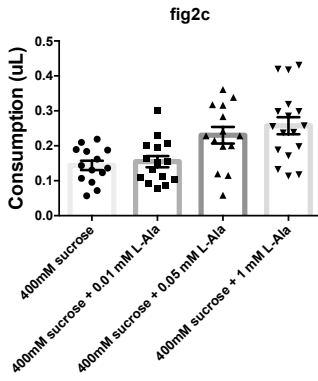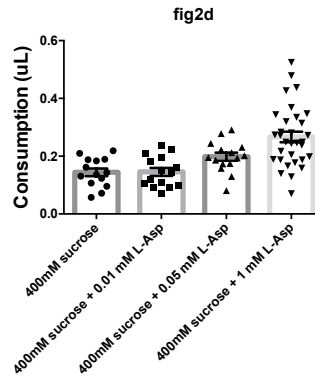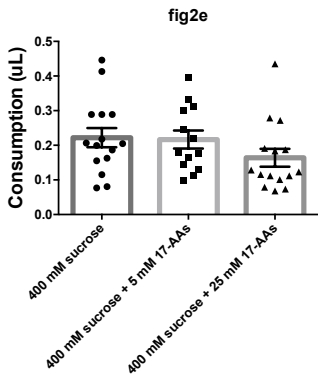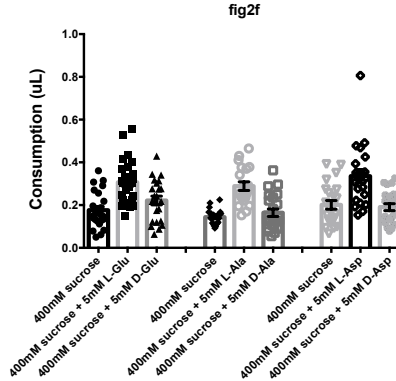

fig3a

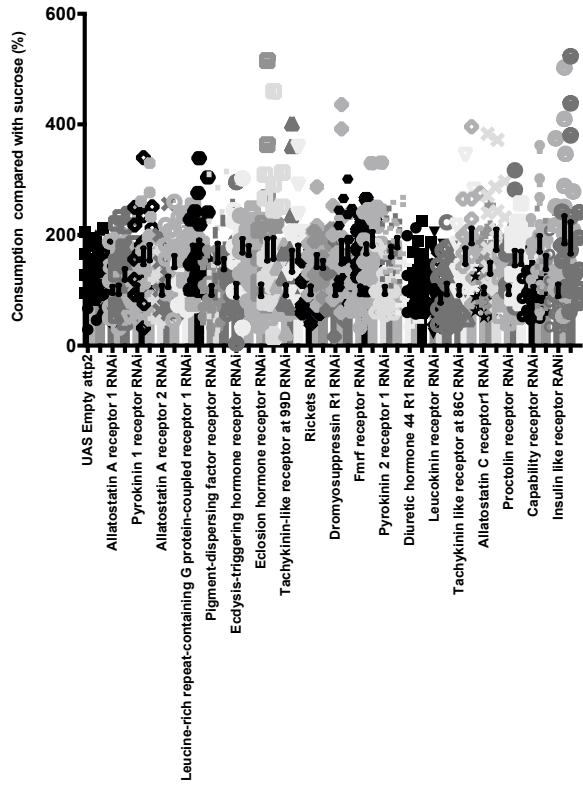

fig3c

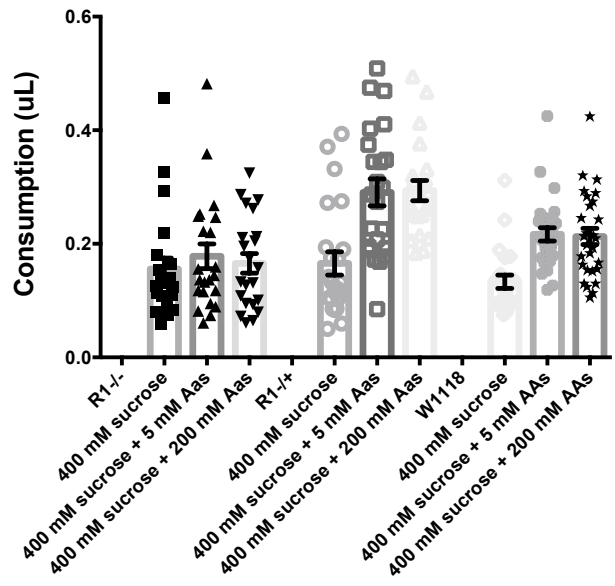

fig3d

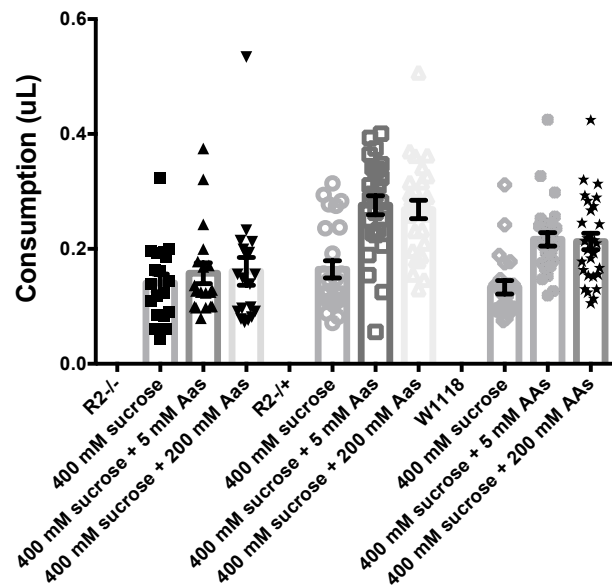

fig3f

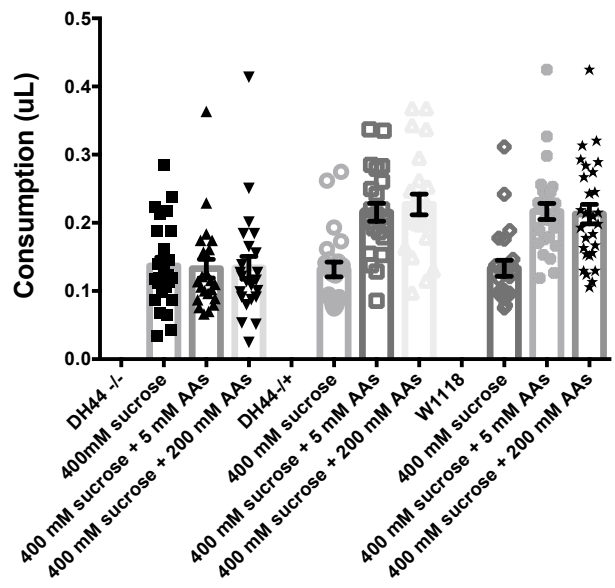

fig4f

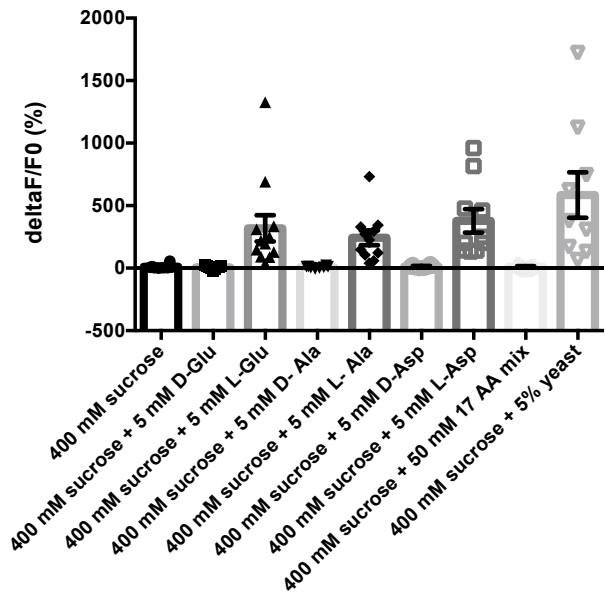

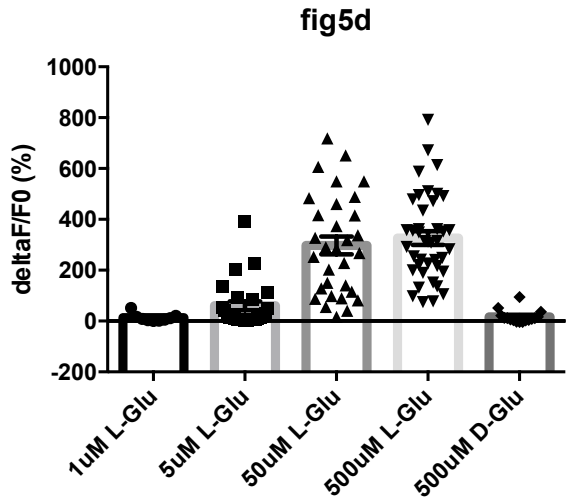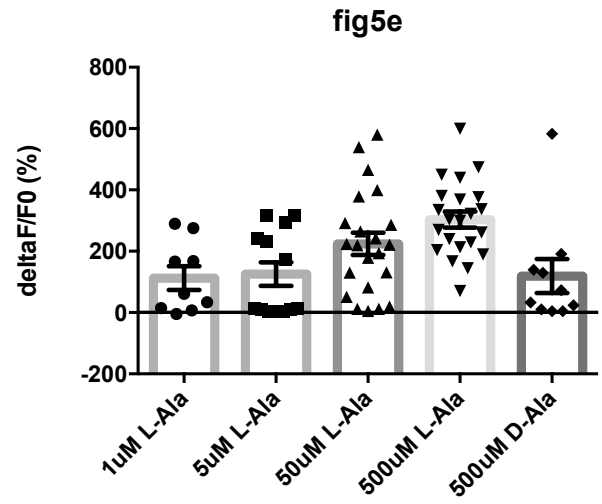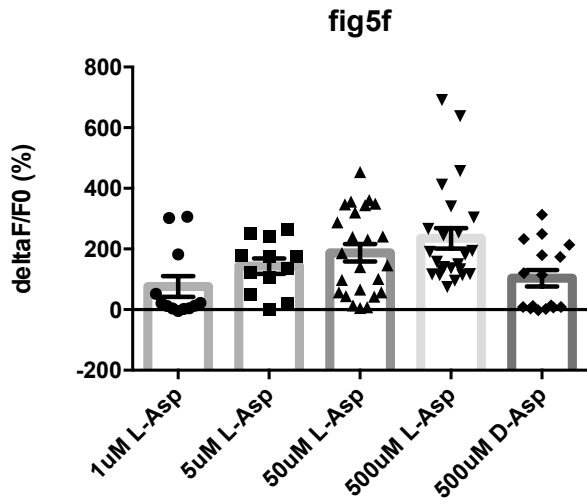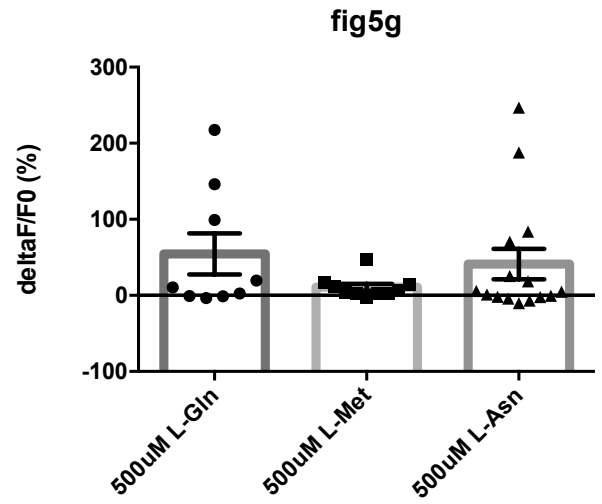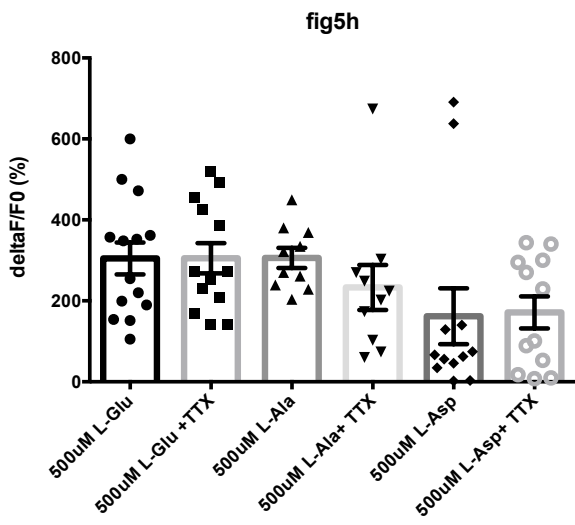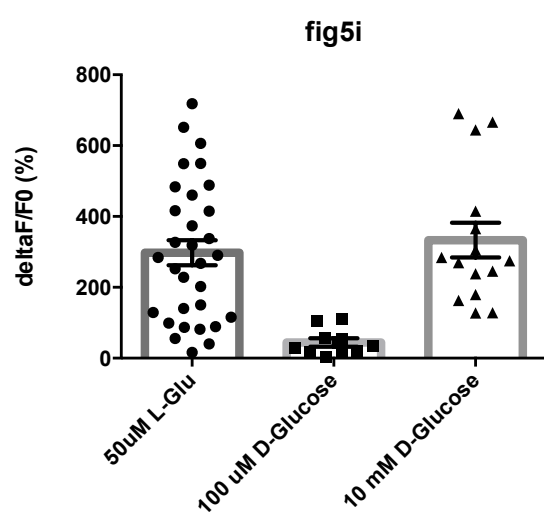

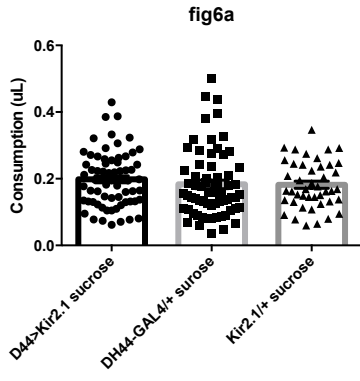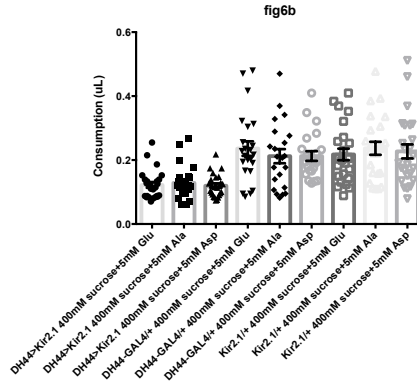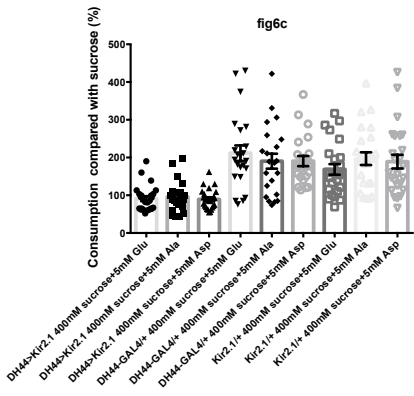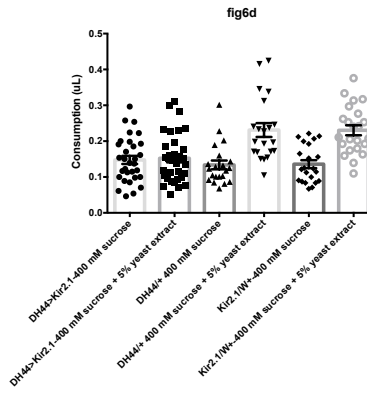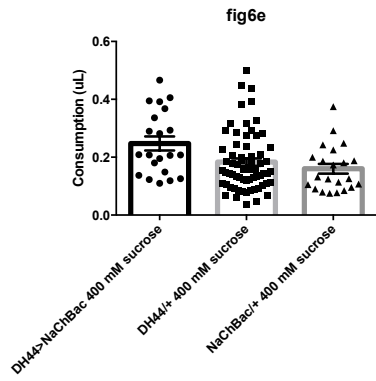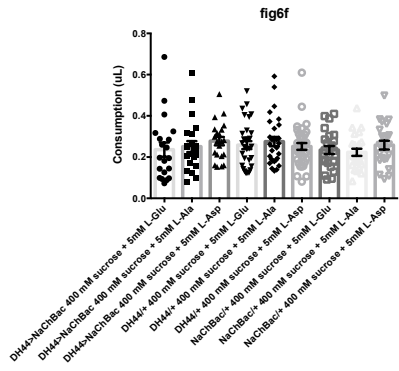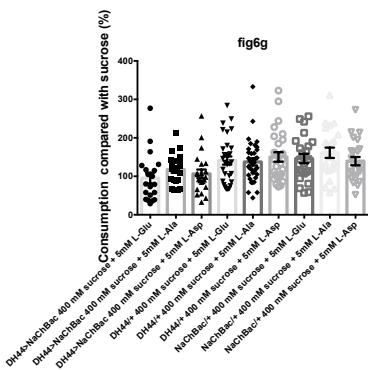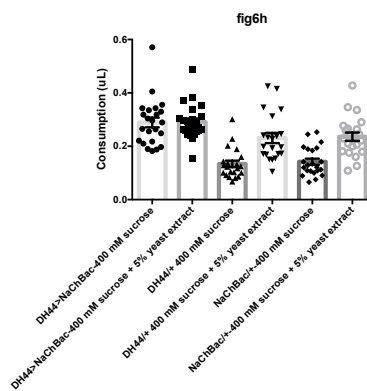

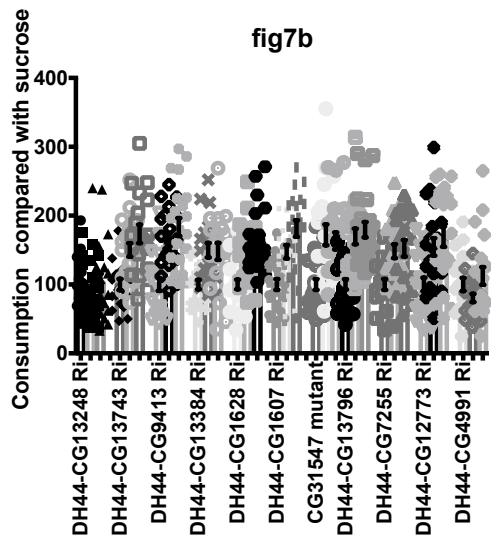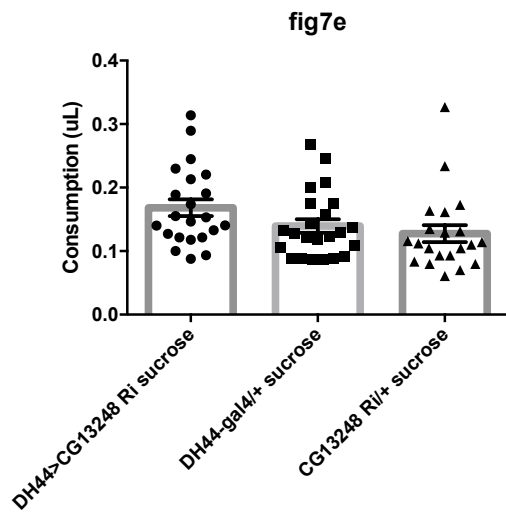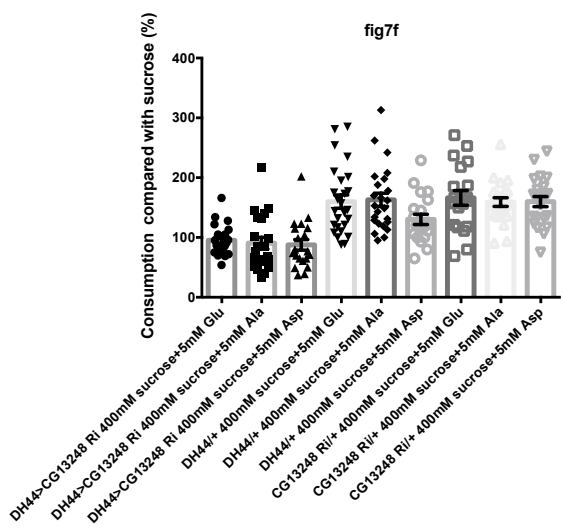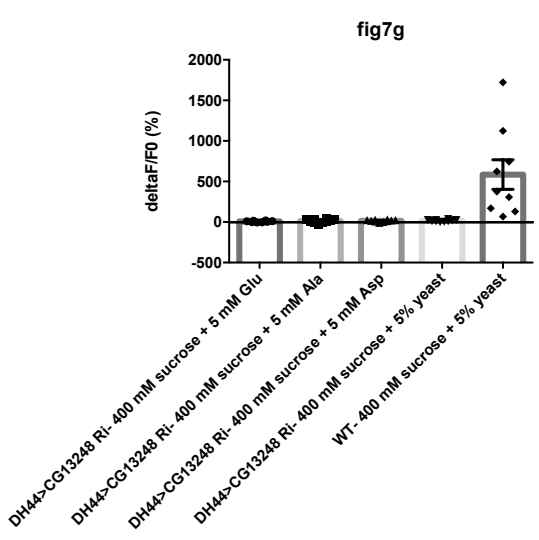



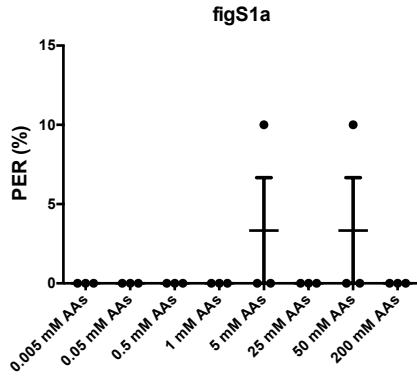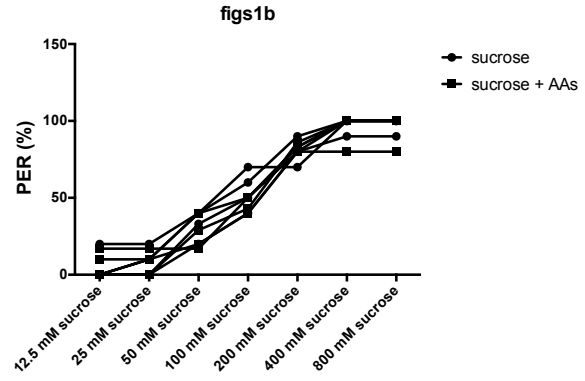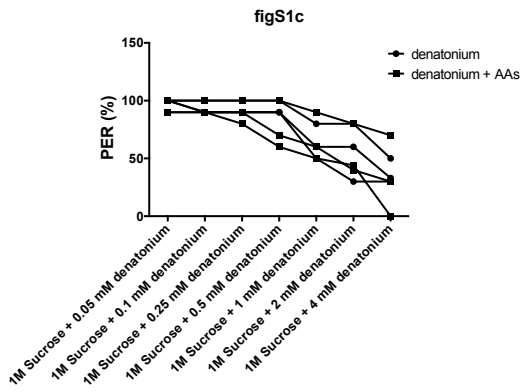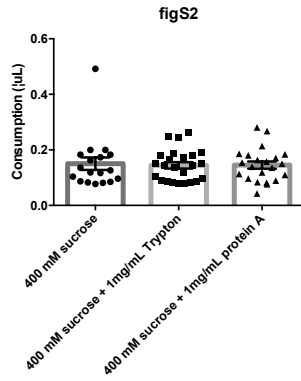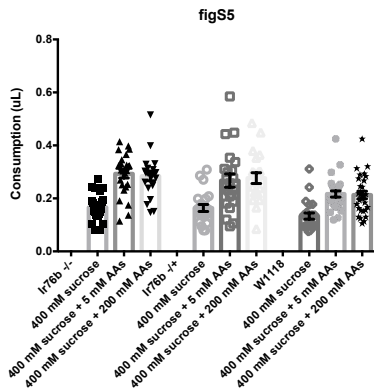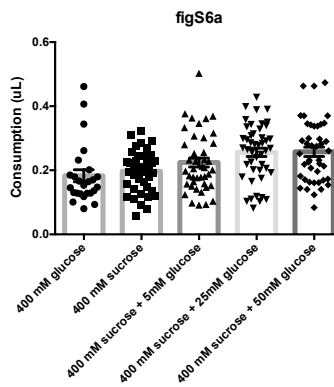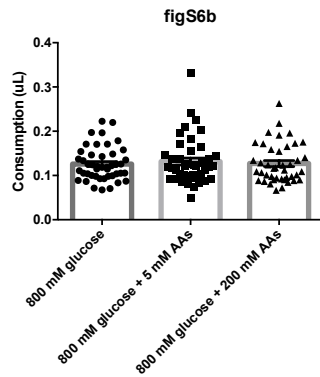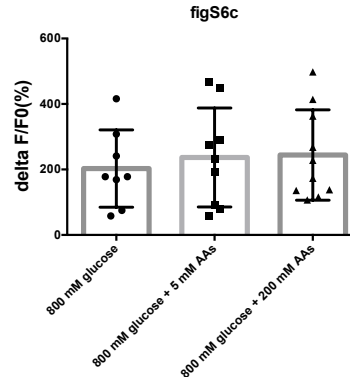

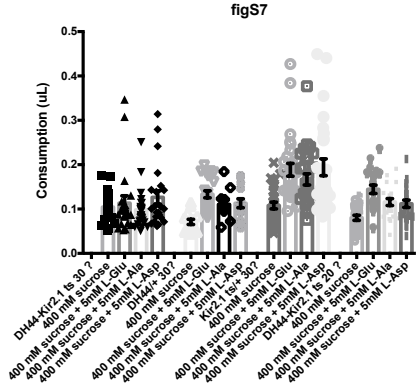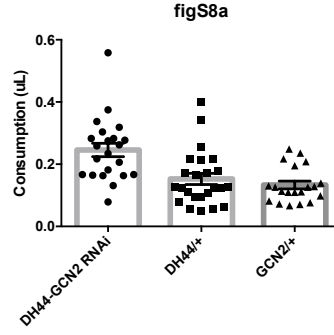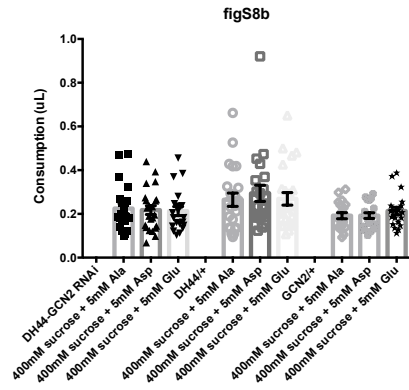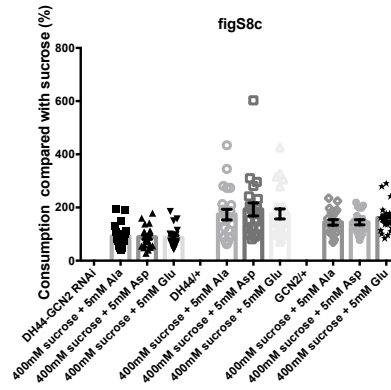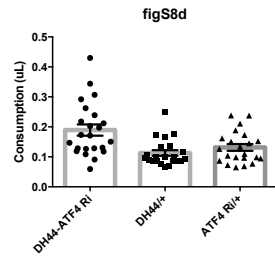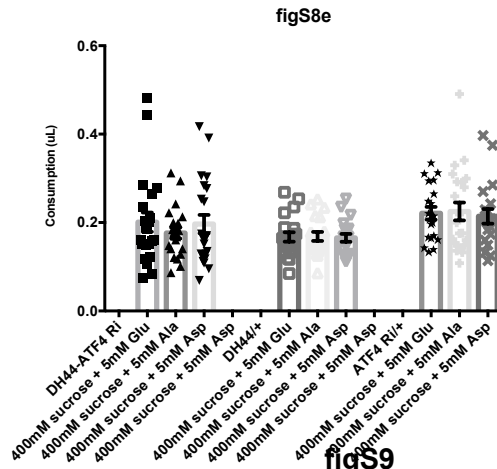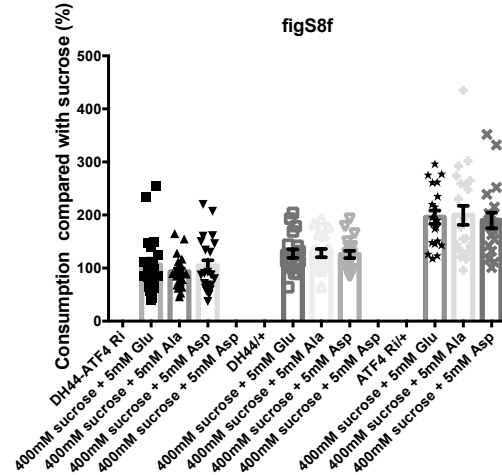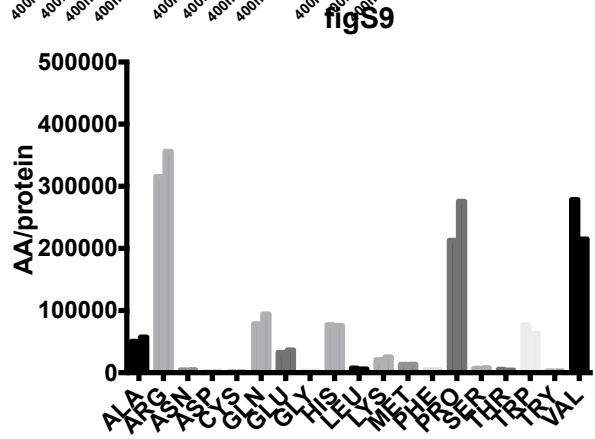

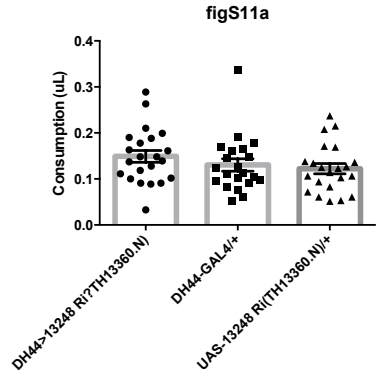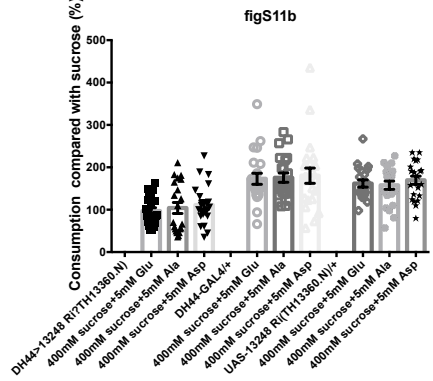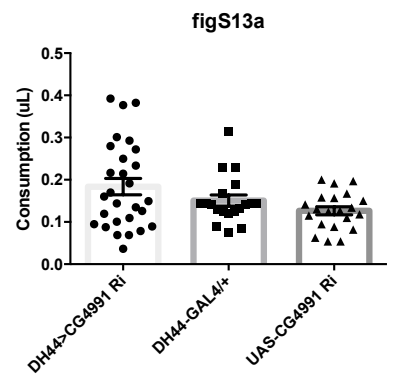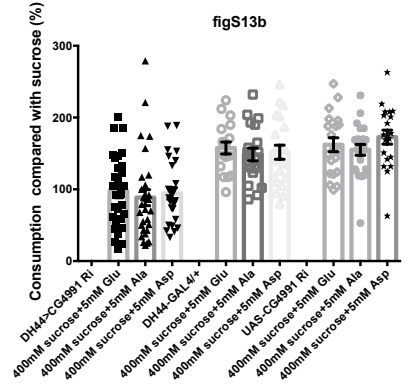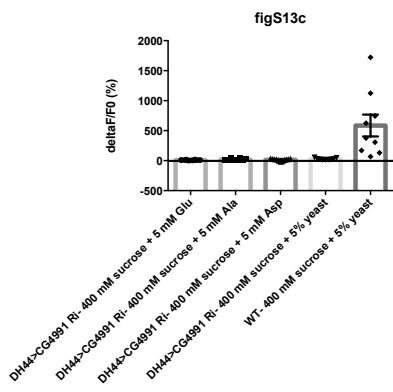

Supplement: 41422_2018_84_MOESM17_ESM.pdf [file 41422_2018_84_MOESM17_ESM.pdf]
