# Supplementary material for: A post-ingestive amino acid sensor promotes food consumption in Drosophila
Source: PubMed Central journal article supplement (PMC6170445; doi:10.1038/s41422-018-0084-9), 2018-09-12
Supplement: 41422_2018_84_MOESM1_ESM.pdf [file 41422_2018_84_MOESM1_ESM.pdf]

Figure S1

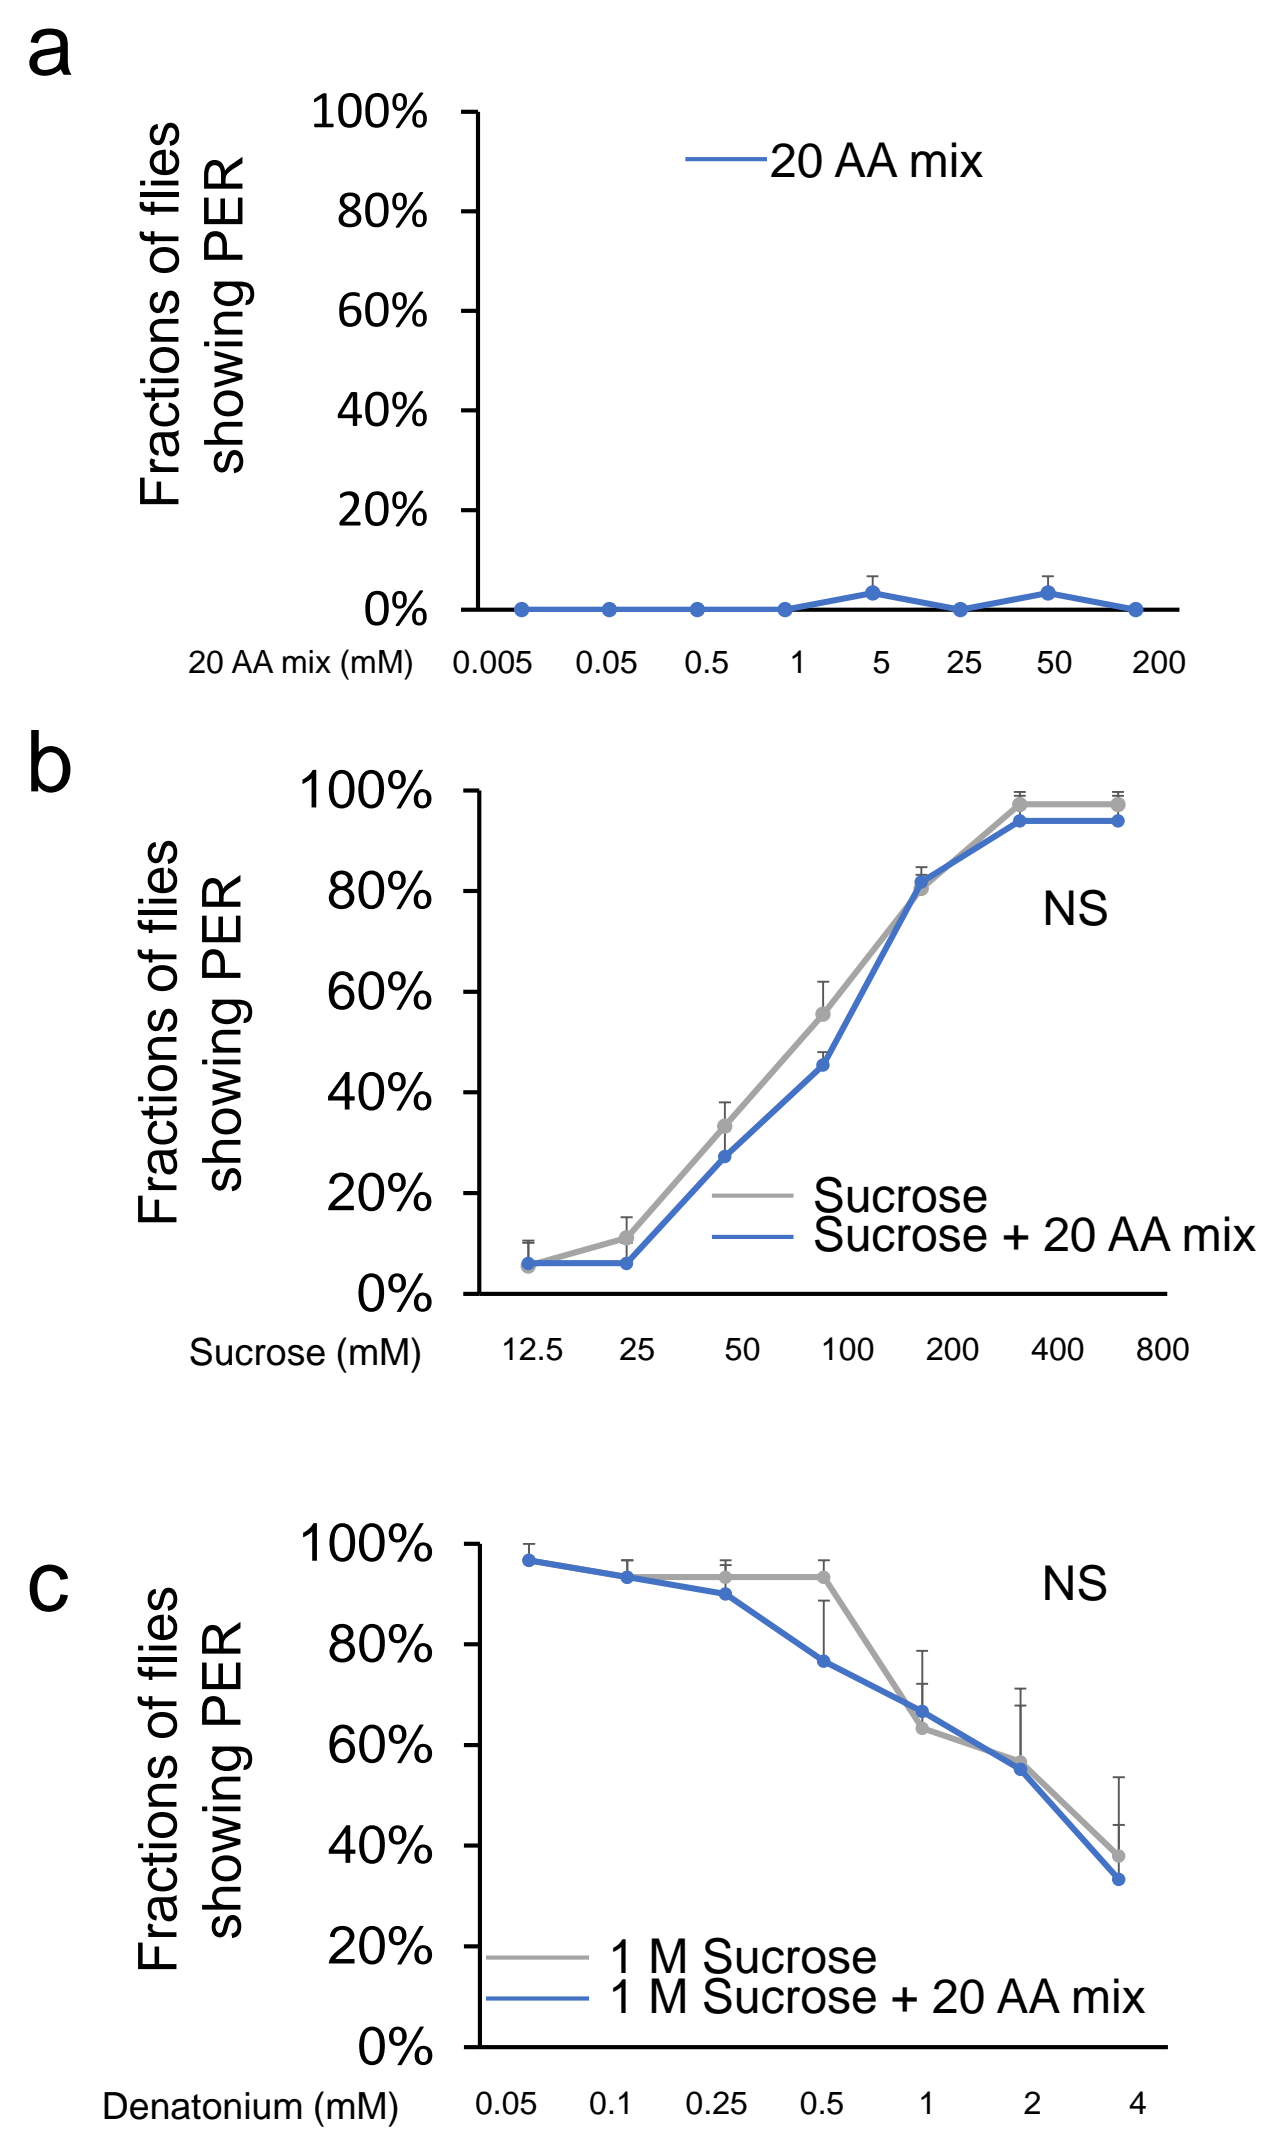

**Figure S1. Dietary amino acids do not alter PER responses to sweet and bitter compounds.**

(a) Fractions of *Canton-S* flies fed *ad libitum* showing PER response to certain concentrations of amino acid mixture (n=21). (b) Fractions of *Canton-S* flies fed *ad libitum* showing PER responses to different concentrations of sucrose in the absence or presence of 50 mM amino acid mixture (n=31-38). (c) Fractions of *Canton-S* flies fed *ad libitum* showing PER responses to 1 M sucrose plus different concentrations of denatonium in the absence or presence of 50 mM amino acid mixture (n=30-31). Virgin females were used for all experiments shown in this figure. Data are shown as means ( $\pm$  SEM). NS,  $P > 0.05$ .
