# Supplementary material for: A post-ingestive amino acid sensor promotes food consumption in Drosophila
Source: PubMed Central journal article supplement (PMC6170445; doi:10.1038/s41422-018-0084-9), 2018-09-12
Supplement: 41422_2018_84_MOESM2_ESM.pdf [file 41422_2018_84_MOESM2_ESM.pdf]

Figure S2

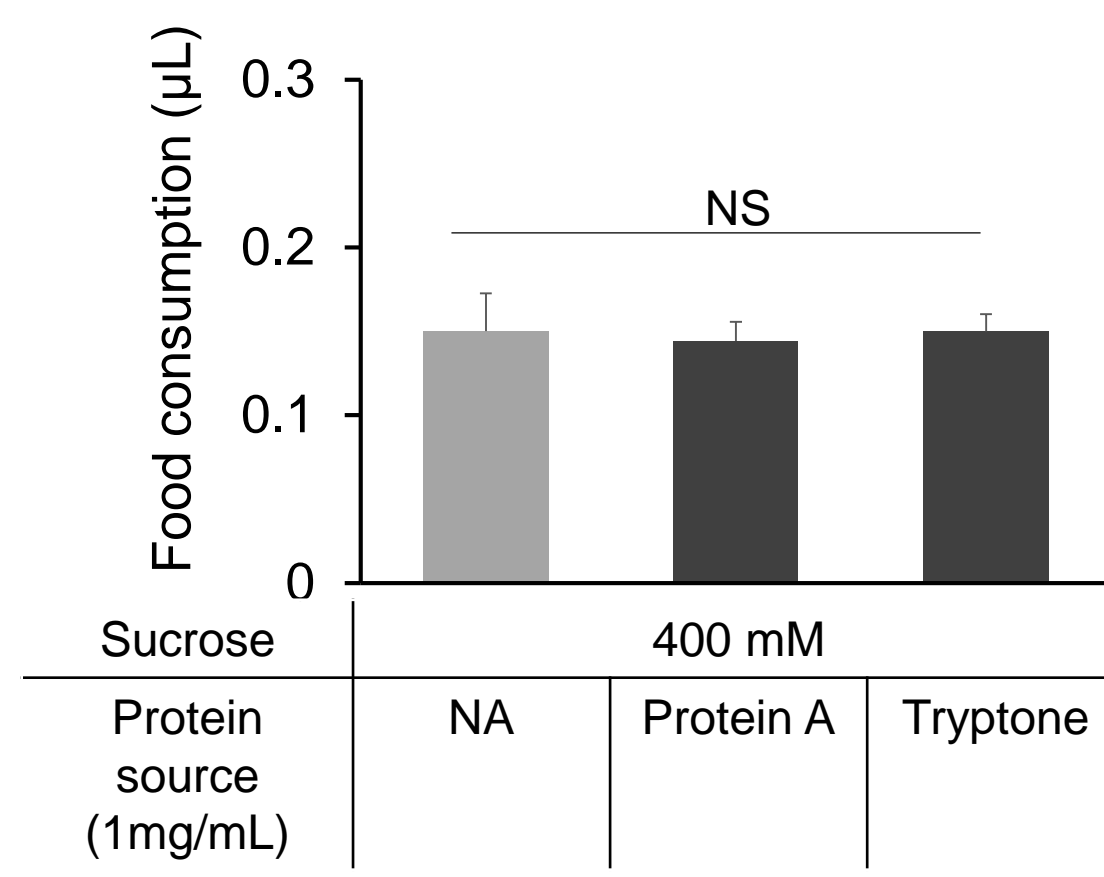

**Figure S2. Whole proteins do not promote food consumption in the MAFE assay.**

Volume of 400 mM sucrose consumed by *Canton-S* flies, in the presence or absence of certain protein sources (n=18-24). Virgin females were used for all experiments shown in this figure. Data are shown as means ( $\pm$  SEM). NS,  $P > 0.05$ ; \* $P < 0.05$ ; \*\* $P < 0.01$ ; \*\*\* $P < 0.001$ ; \*\*\*\* $P < 0.0001$ .
