# Supplementary material for: A post-ingestive amino acid sensor promotes food consumption in Drosophila
Source: PubMed Central journal article supplement (PMC6170445; doi:10.1038/s41422-018-0084-9), 2018-09-12
Supplement: 41422_2018_84_MOESM3_ESM.pdf [file 41422_2018_84_MOESM3_ESM.pdf]

Figure S3

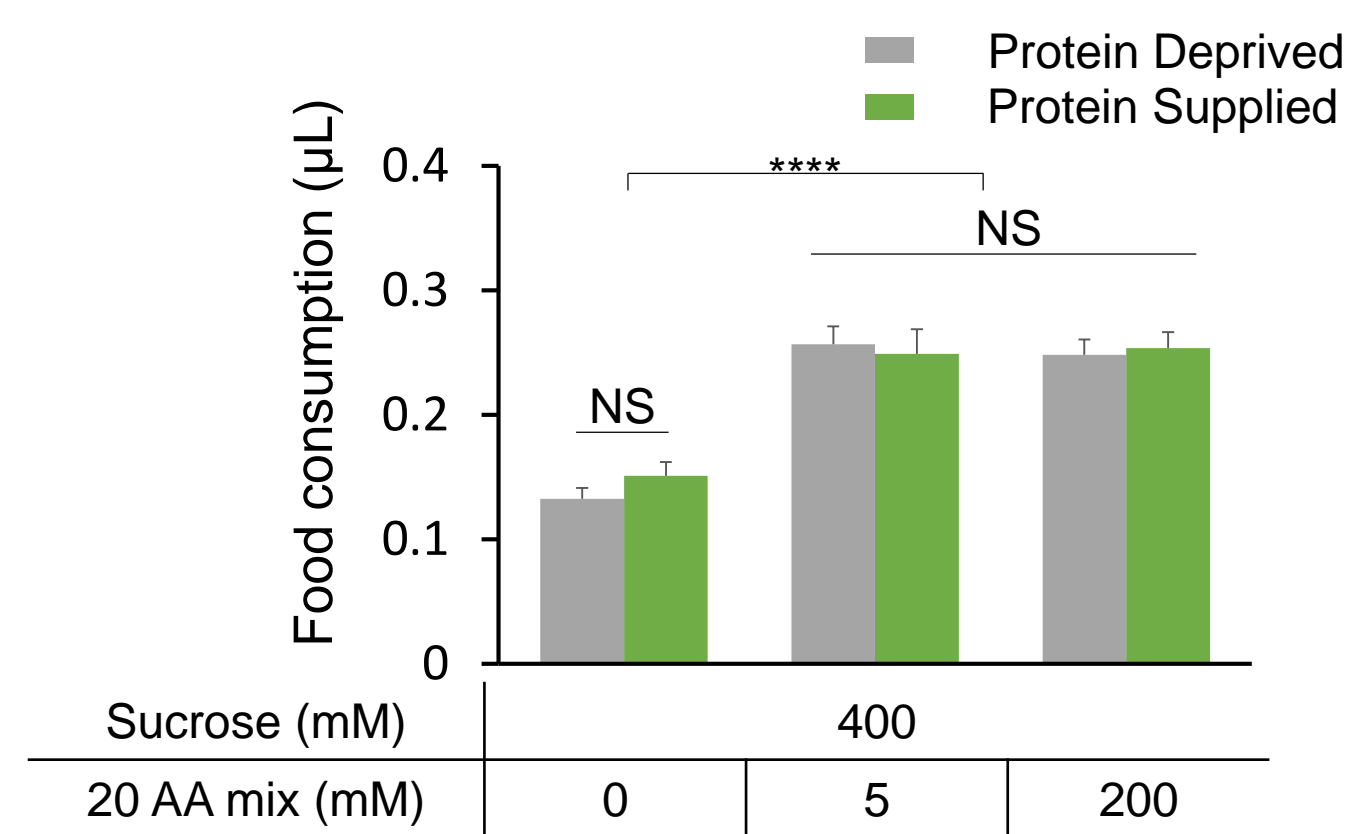

**Figure S3. Protein deprivation does not change the effect of dietary amino acids to promote food consumption.**

Volume of food consumed by *Canton-S* flies that were raised in the absence of yeast extract (“Protein deprived”) or in the presence of 5% yeast extract (“Protein supplied”) (n=22-59). Virgin females were used for all experiments shown in this figure. Data are shown as means ( $\pm$  SEM). NS,  $P > 0.05$ ; \* $P < 0.05$ ; \*\* $P < 0.01$ ; \*\*\* $P < 0.001$ ; \*\*\*\* $P < 0.0001$ .
