# Supplementary material for: A post-ingestive amino acid sensor promotes food consumption in Drosophila
Source: PubMed Central journal article supplement (PMC6170445; doi:10.1038/s41422-018-0084-9), 2018-09-12
Supplement: 41422_2018_84_MOESM4_ESM.pdf [file 41422_2018_84_MOESM4_ESM.pdf]

Figure S4

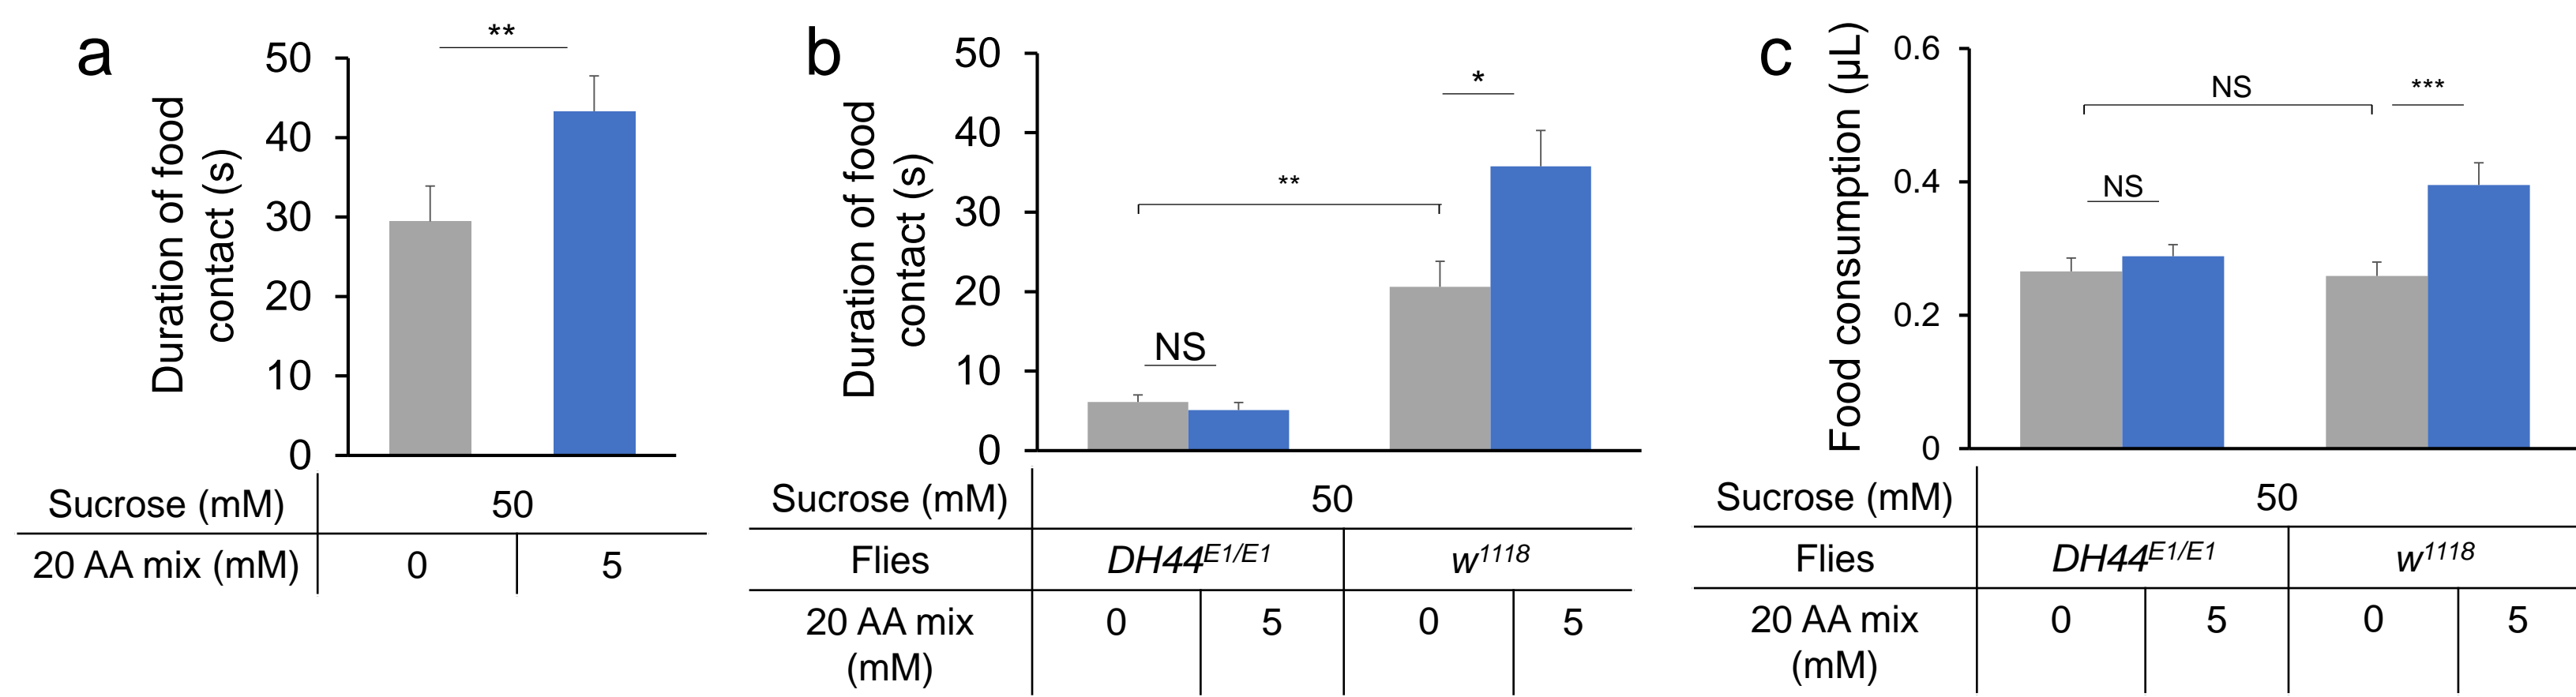

**Figure S4. Dietary amino acids promotes food consumption in free moving flies.**

(a) Duration of food contact of *Canton-S* flies when fed with sucrose alone (grey) or sucrose plus amino acid mixture (blue) in the FLIC assay (n=29-34). (b) Duration of food contact of *DH44<sup>E1/E1</sup>* mutant and control flies when fed with 50 mM sucrose in presence (blue) or absence (grey) of 5 mM amino acid mixture (n=19-34). (c) Volume of 50 mM sucrose in presence (blue) or absence (grey) of 5 mM amino acid mixture consumed by indicated genotypes (n=21-25). Virgin females were used for all experiments shown in this figure. Data are shown as means ( $\pm$  SEM). NS,  $P > 0.05$ ; \* $P < 0.05$ ; \*\* $P < 0.01$ ; \*\*\* $P < 0.001$ ; \*\*\*\* $P < 0.0001$ .
