# Supplementary material for: A post-ingestive amino acid sensor promotes food consumption in Drosophila
Source: PubMed Central journal article supplement (PMC6170445; doi:10.1038/s41422-018-0084-9), 2018-09-12
Supplement: 41422_2018_84_MOESM6_ESM.pdf [file 41422_2018_84_MOESM6_ESM.pdf]

Figure S6

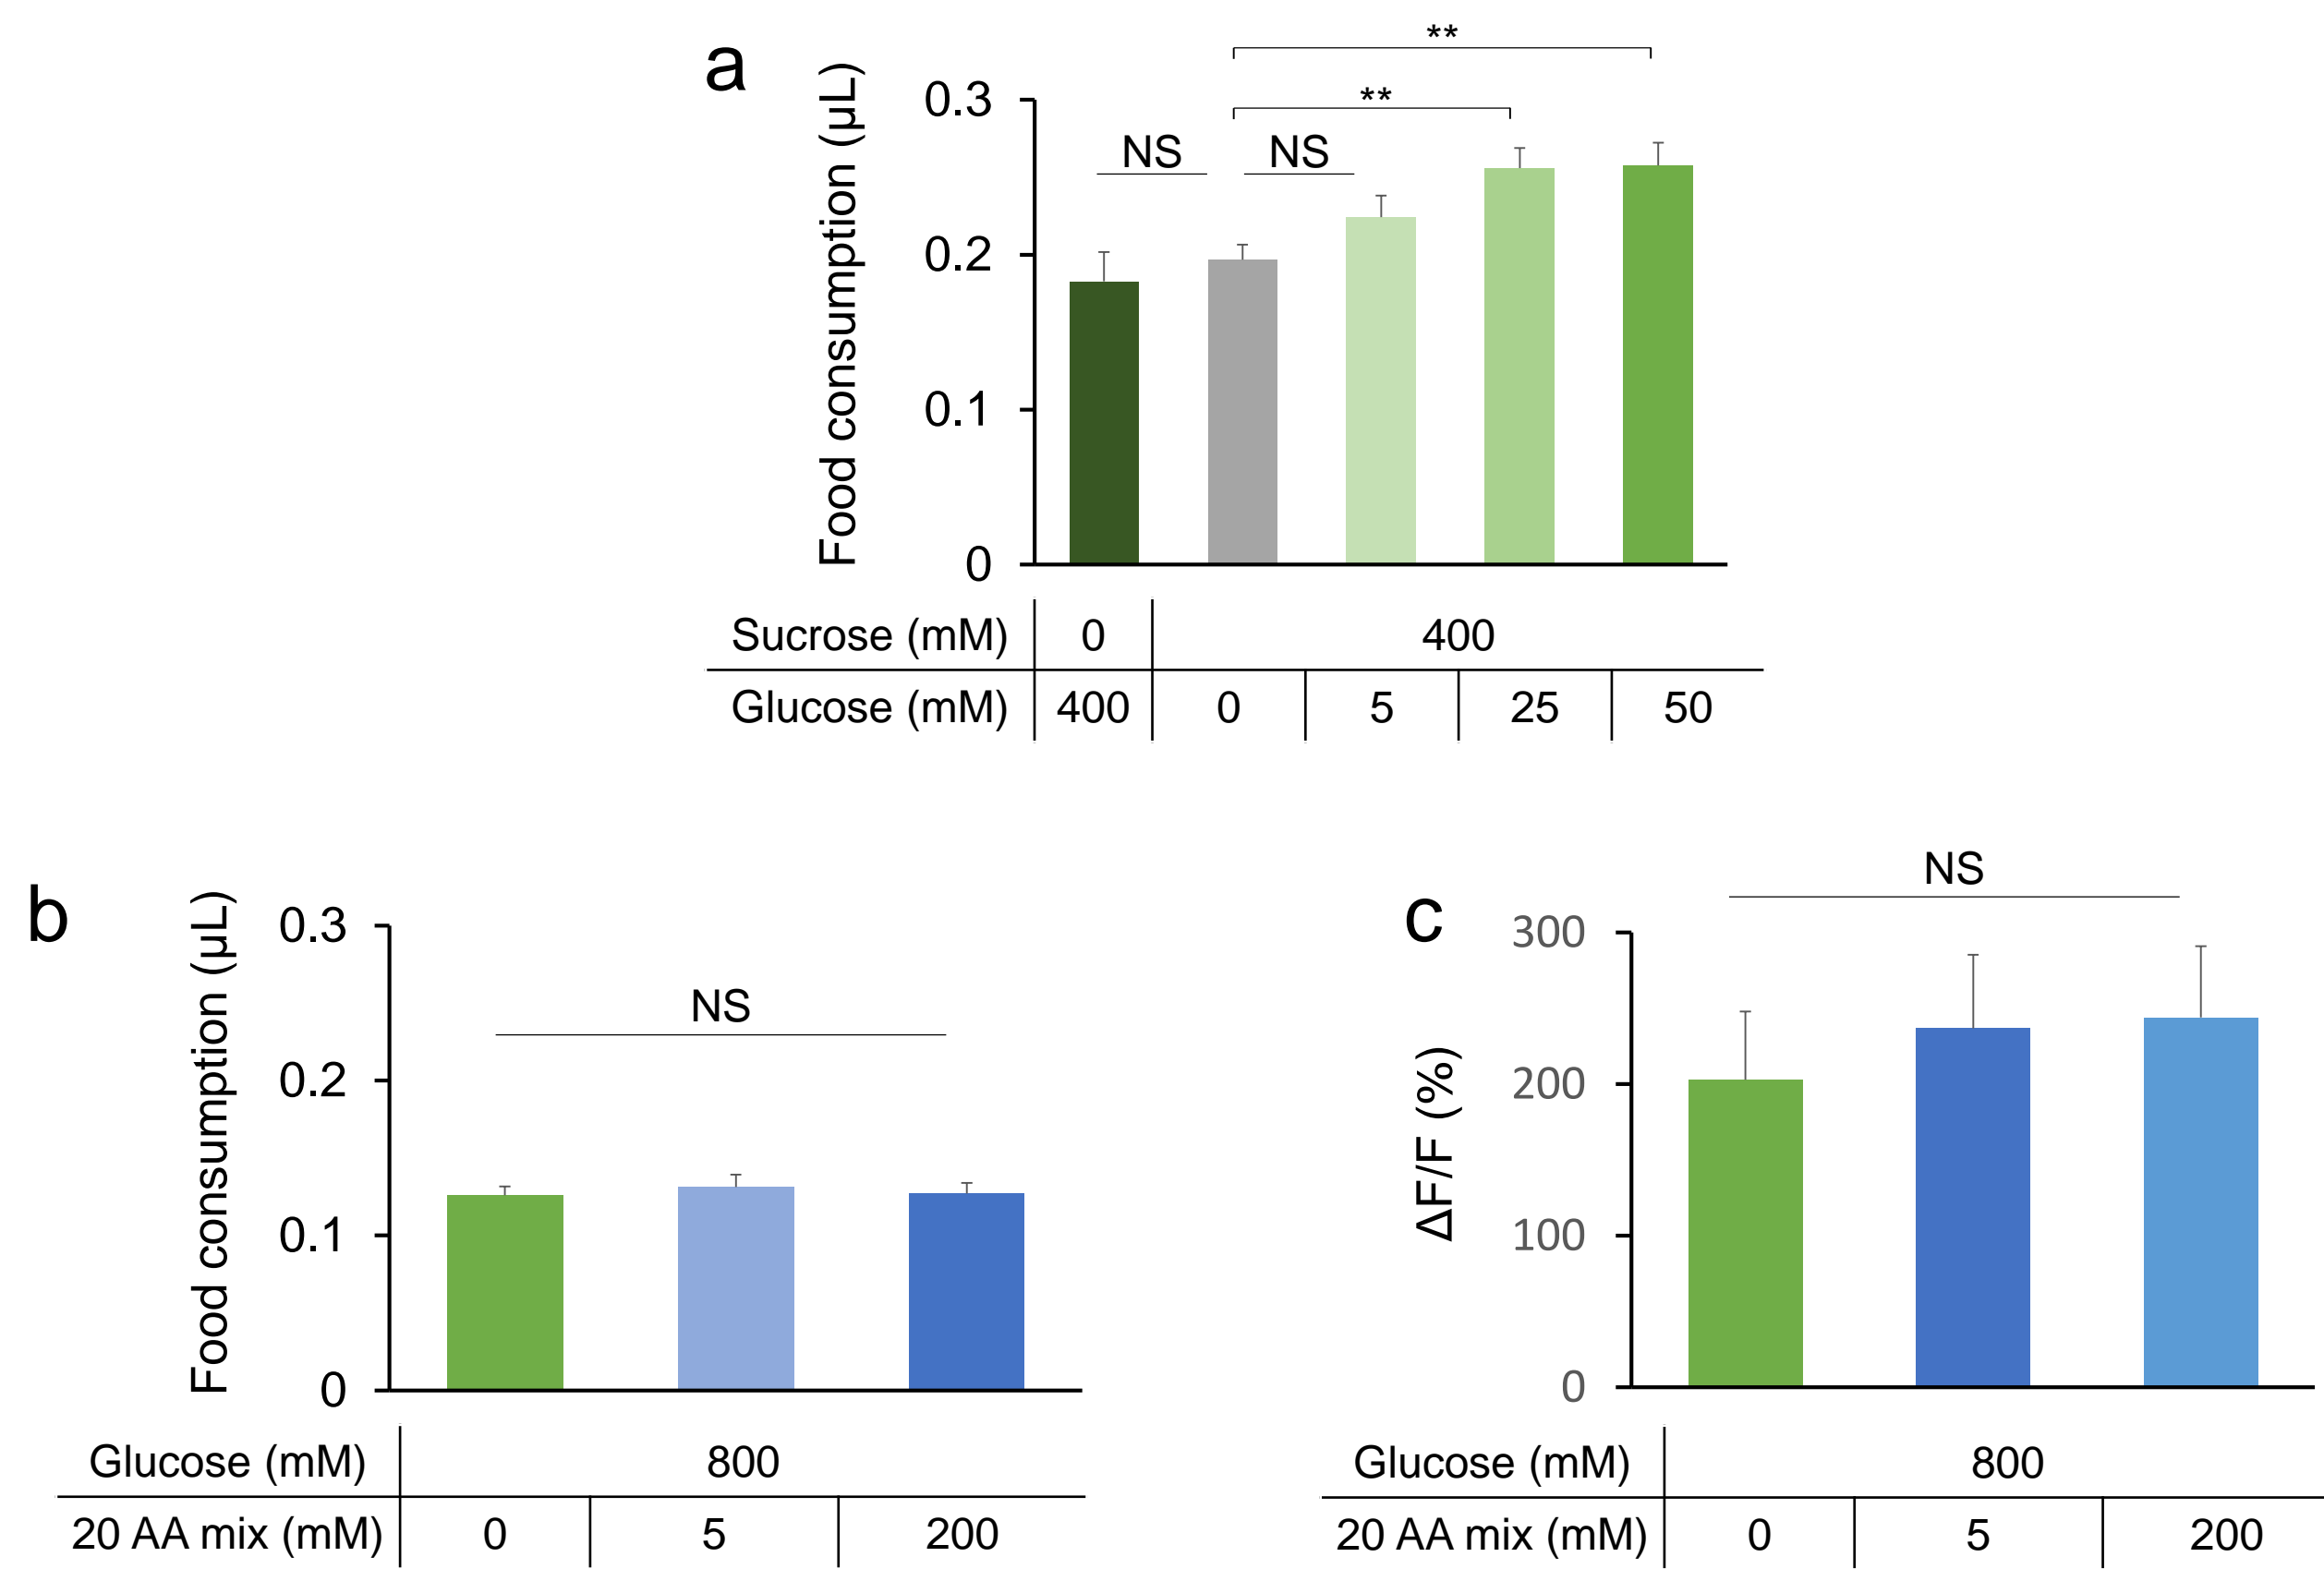

**Figure S6. D-glucose and dietary amino acids both promote food consumption.**

(a) Volume of 400 mM sucrose consumed by *Canton-S* flies fed *ad libitum* in the presence of varying concentrations of D-glucose (n=25-46). (b) Volume of indicated food consumed by *Canton-S* flies fed *ad libitum* (n=22-23). (c) Volume of 800 mM D-glucose (green) or 800 mM glucose plus different concentrations of amino acid mixture (blue) consumed by *Canton-S* flies fed *ad libitum* (n=42-45). Virgin females were used for all experiments shown in this figure. Data are shown as means ( $\pm$  SEM). NS,  $P > 0.05$ ; \* $P < 0.05$ ; \*\* $P < 0.01$ ; \*\*\* $P < 0.001$ ; \*\*\*\* $P < 0.0001$ .
