# Supplementary material for: A post-ingestive amino acid sensor promotes food consumption in Drosophila
Source: PubMed Central journal article supplement (PMC6170445; doi:10.1038/s41422-018-0084-9), 2018-09-12
Supplement: 41422_2018_84_MOESM7_ESM.pdf [file 41422_2018_84_MOESM7_ESM.pdf]

Figure S7

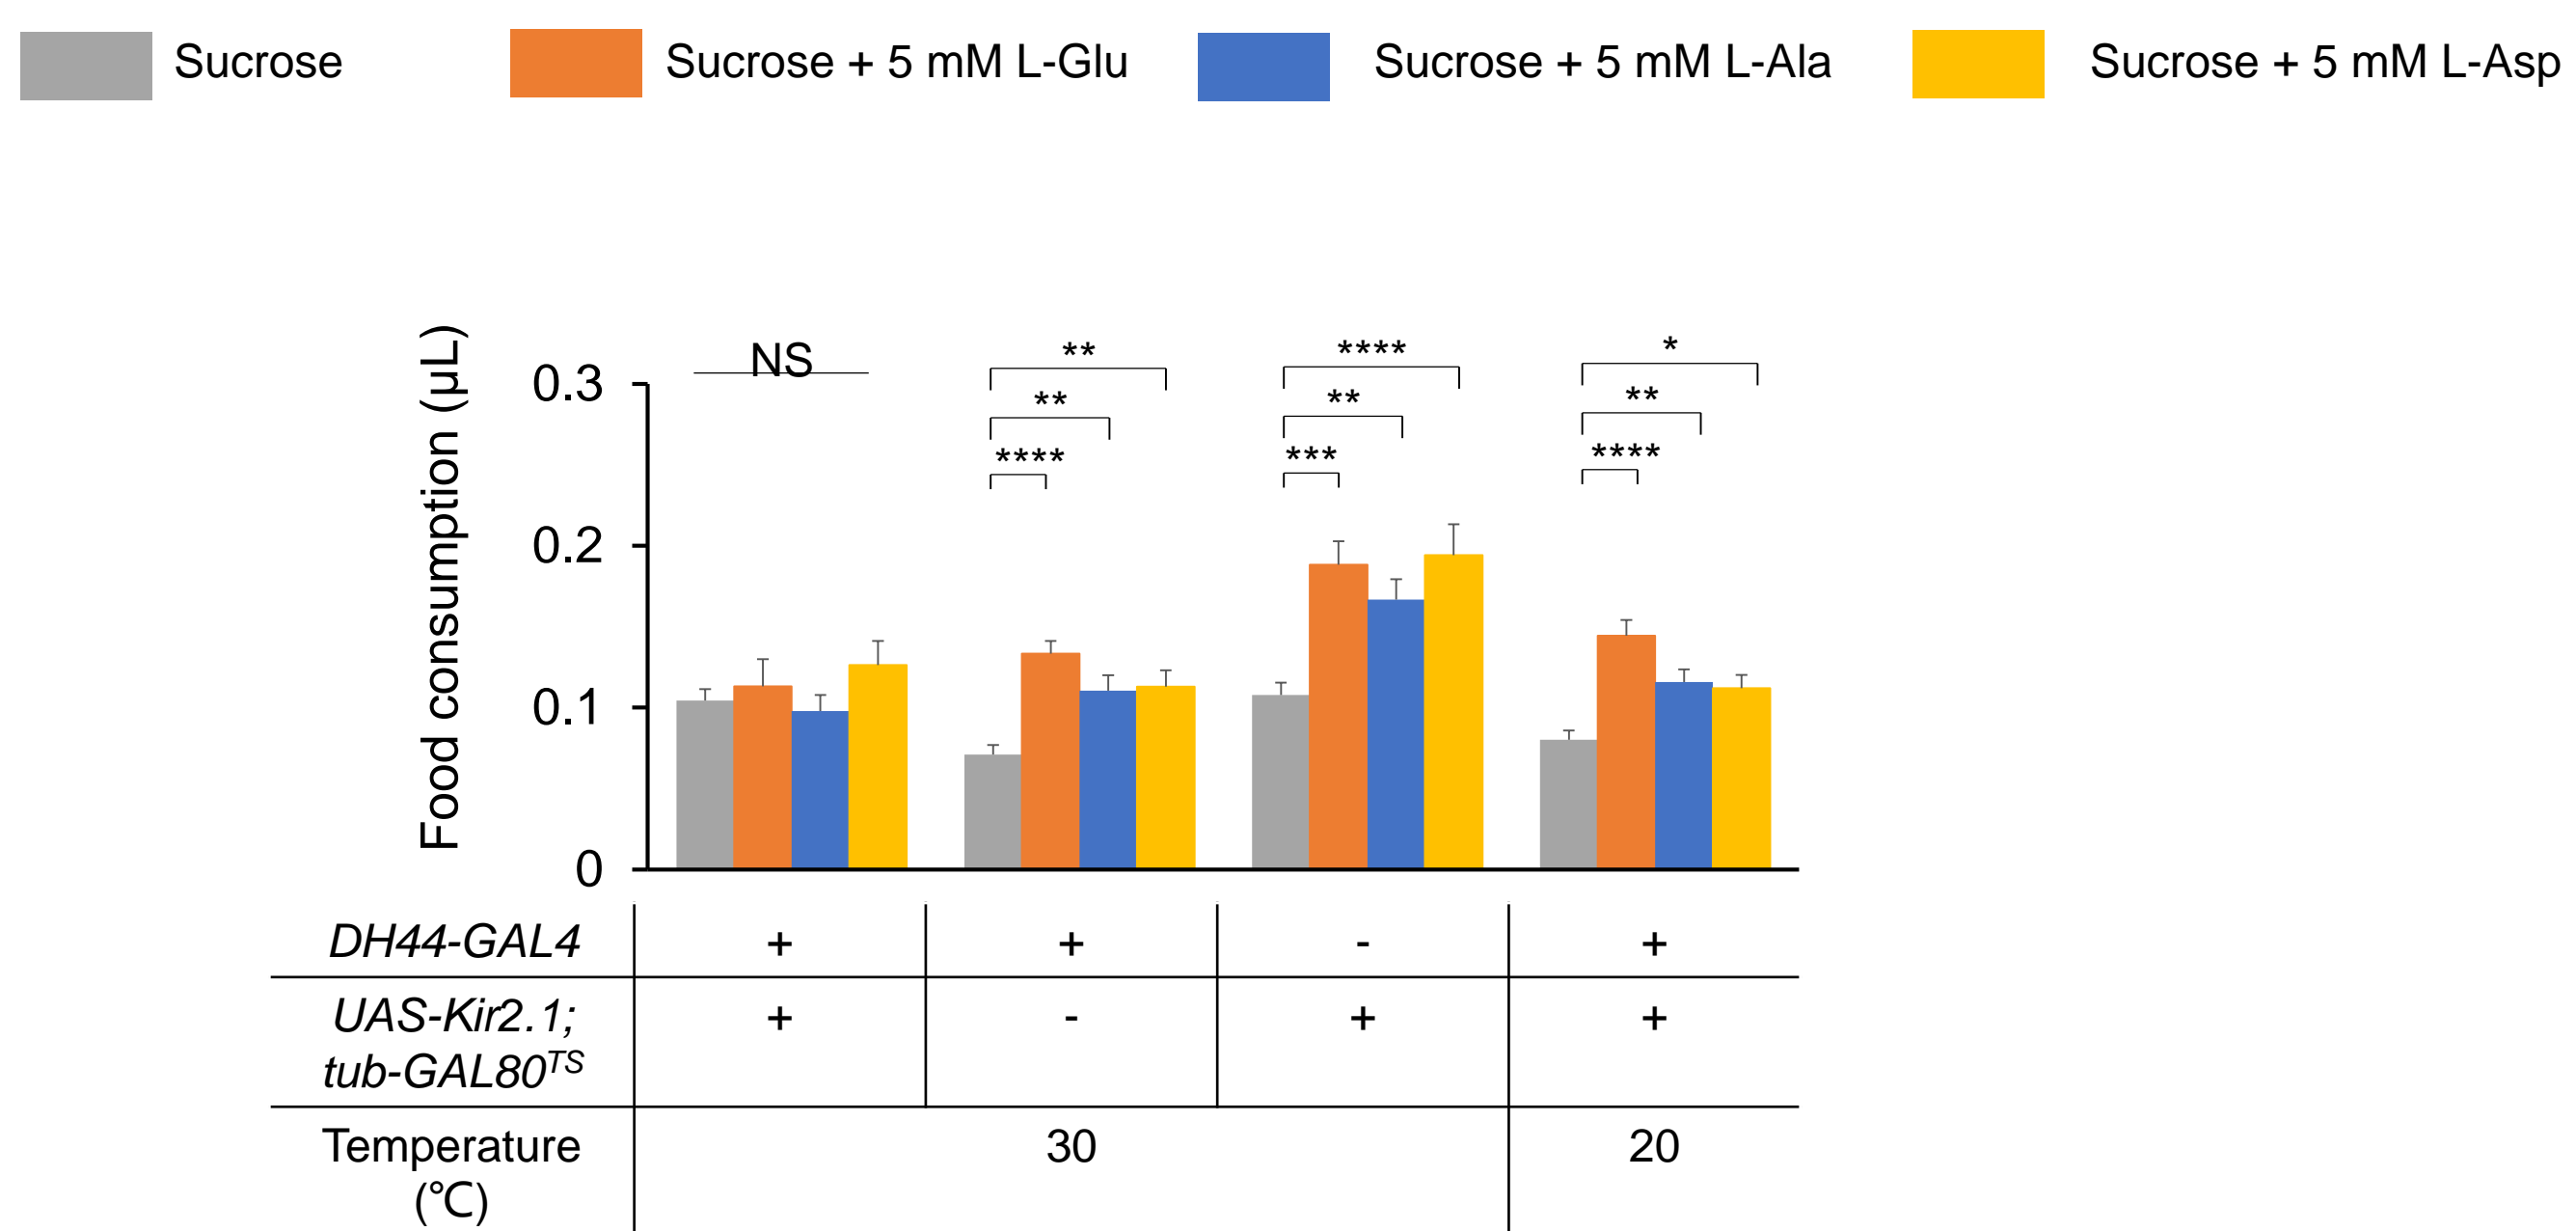

**Figure S7. Acute silencing of DH44<sup>+</sup> neurons eliminates the increase in food consumption by dietary amino acids.**

Volume of 400 mM sucrose plus 5 mM of indicated amino acid consumed by indicated genotypes (n=14-31). Virgin females were used for all experiments shown in this figure.

Data are shown as means ( $\pm$  SEM). NS,  $P > 0.05$ ; \* $P < 0.05$ ; \*\* $P < 0.01$ ; \*\*\* $P < 0.001$ ;

\*\*\*\* $P < 0.0001$ .
