# Supplementary material for: A post-ingestive amino acid sensor promotes food consumption in Drosophila
Source: PubMed Central journal article supplement (PMC6170445; doi:10.1038/s41422-018-0084-9), 2018-09-12
Supplement: 41422_2018_84_MOESM9_ESM.pdf [file 41422_2018_84_MOESM9_ESM.pdf]

Figure S9

| <b>AA name</b> | <b>AA-deprived</b> | <b>AA-supplied</b> | <b>P value</b> |
|----------------|--------------------|--------------------|----------------|
| ALA            | 5.05E+04           | 5.72E+04           | 0.327          |
| ARG            | 3.15E+05           | 3.56E+05           | 0.339          |
| ASN            | 4.52E+03           | 4.82E+03           | 0.615          |
| ASP            | 1.98E+03           | 2.37E+03           | 0.212          |
| CYS            | 9.41E+02           | 8.43E+02           | 0.389          |
| GLN            | 7.87E+04           | 9.43E+04           | 0.209          |
| GLU            | 3.24E+04           | 3.65E+04           | 0.306          |
| GLY            | 2.80E+03           | 3.12E+03           | 0.404          |
| HIS            | 7.72E+04           | 7.60E+04           | 0.886          |
| LEU            | 7.33E+03           | 5.87E+03           | 0.132          |
| LYS            | 2.08E+04           | 2.52E+04           | 0.14           |
| MET            | 1.33E+04           | 1.36E+04           | 0.824          |
| PHE            | 4.35E+03           | 4.42E+03           | 0.912          |
| PRO            | 2.13E+05           | 2.75E+05           | 0.089          |
| SER            | 7.13E+03           | 7.98E+03           | 0.364          |
| THR            | 5.05E+03           | 3.88E+03           | 0.055          |
| TRP            | 7.68E+04           | 6.32E+04           | 0.152          |
| TRY            | 2.65E+03           | 2.86E+03           | 0.558          |
| VAL            | 2.79E+05           | 2.15E+05           | 0.073          |

**Figure S9. Food consumption does not increase the levels of free amino acids in the fly brain.**

Concentrations of 20 amino acids in the fly brain fed with 5% sucrose (AA-deprived) or with 5% sucrose plus 5 mM amino acid mixture (AA-supplied), examined by mass spectrometry (n=3). Virgin females were used for all experiments shown in this figure.
