# Supplementary material for: A post-ingestive amino acid sensor promotes food consumption in Drosophila
Source: PubMed Central journal article supplement (PMC6170445; doi:10.1038/s41422-018-0084-9), 2018-09-12
Supplement: 41422_2018_84_MOESM10_ESM.pdf [file 41422_2018_84_MOESM10_ESM.pdf]

Figure S10

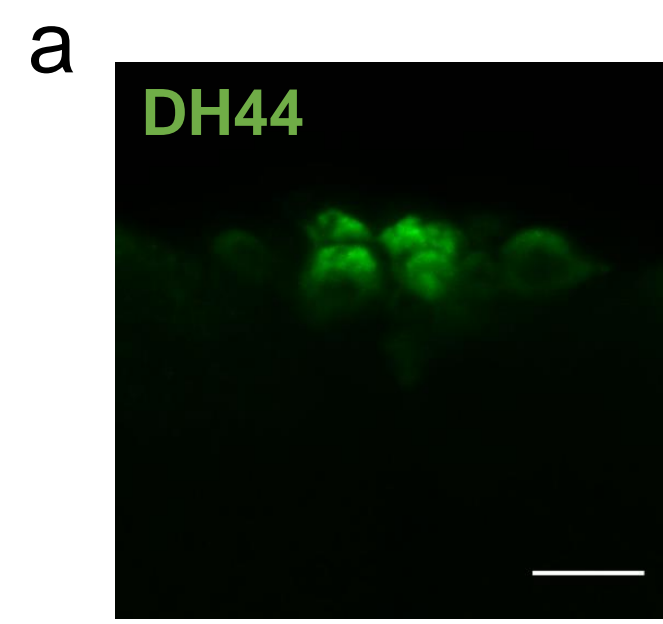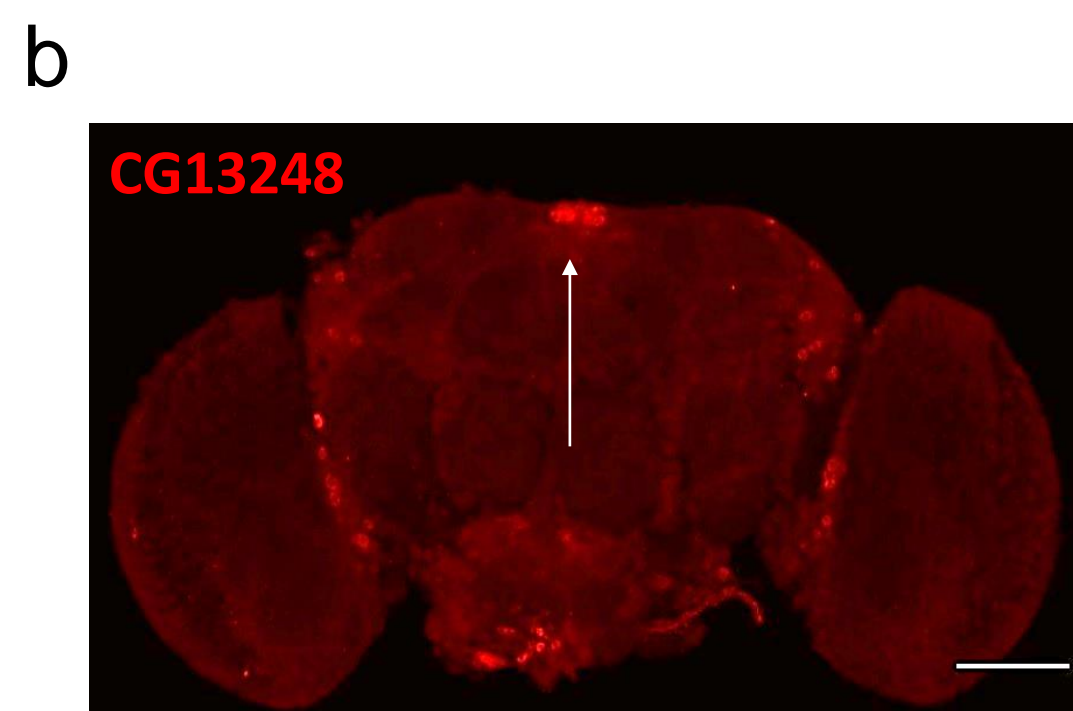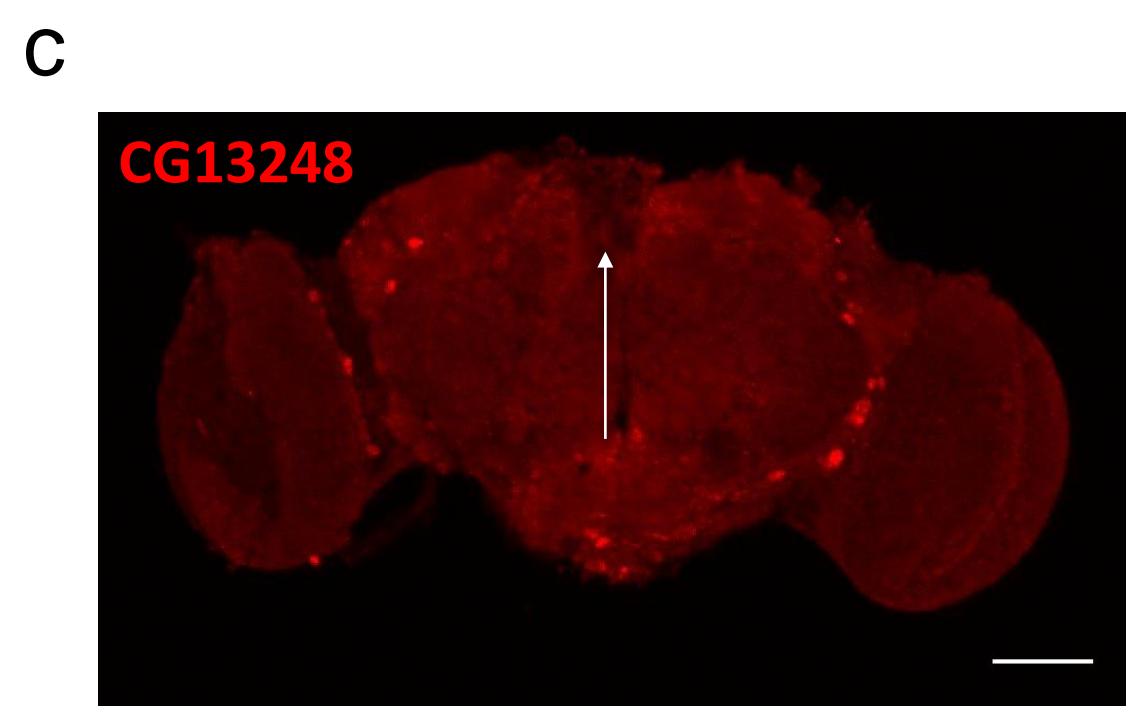

**Figure S10. Validation of CG13248 RNAi knock-down in DH44<sup>+</sup> neurons.**

(a) The expression of GCaMP in DH44<sup>+</sup> neurons after CG13248 knock-down, suggesting these cells are still intact and alive. The scale bar represents 10  $\mu\text{m}$ . **(b-c)** The expression of CG13248 visualized by CG13248 antibody, in the brain of control **(b)** and CG13248 knock-down flies **(c)**. The scale bar represents 20  $\mu\text{m}$ . Arrows indicate DH44<sup>+</sup> neurons in the PI region. Virgin females were used for all experiments shown in this figure.
