# Supplementary material for: A post-ingestive amino acid sensor promotes food consumption in Drosophila
Source: PubMed Central journal article supplement (PMC6170445; doi:10.1038/s41422-018-0084-9), 2018-09-12
Supplement: 41422_2018_84_MOESM11_ESM.pdf [file 41422_2018_84_MOESM11_ESM.pdf]

Figure S11

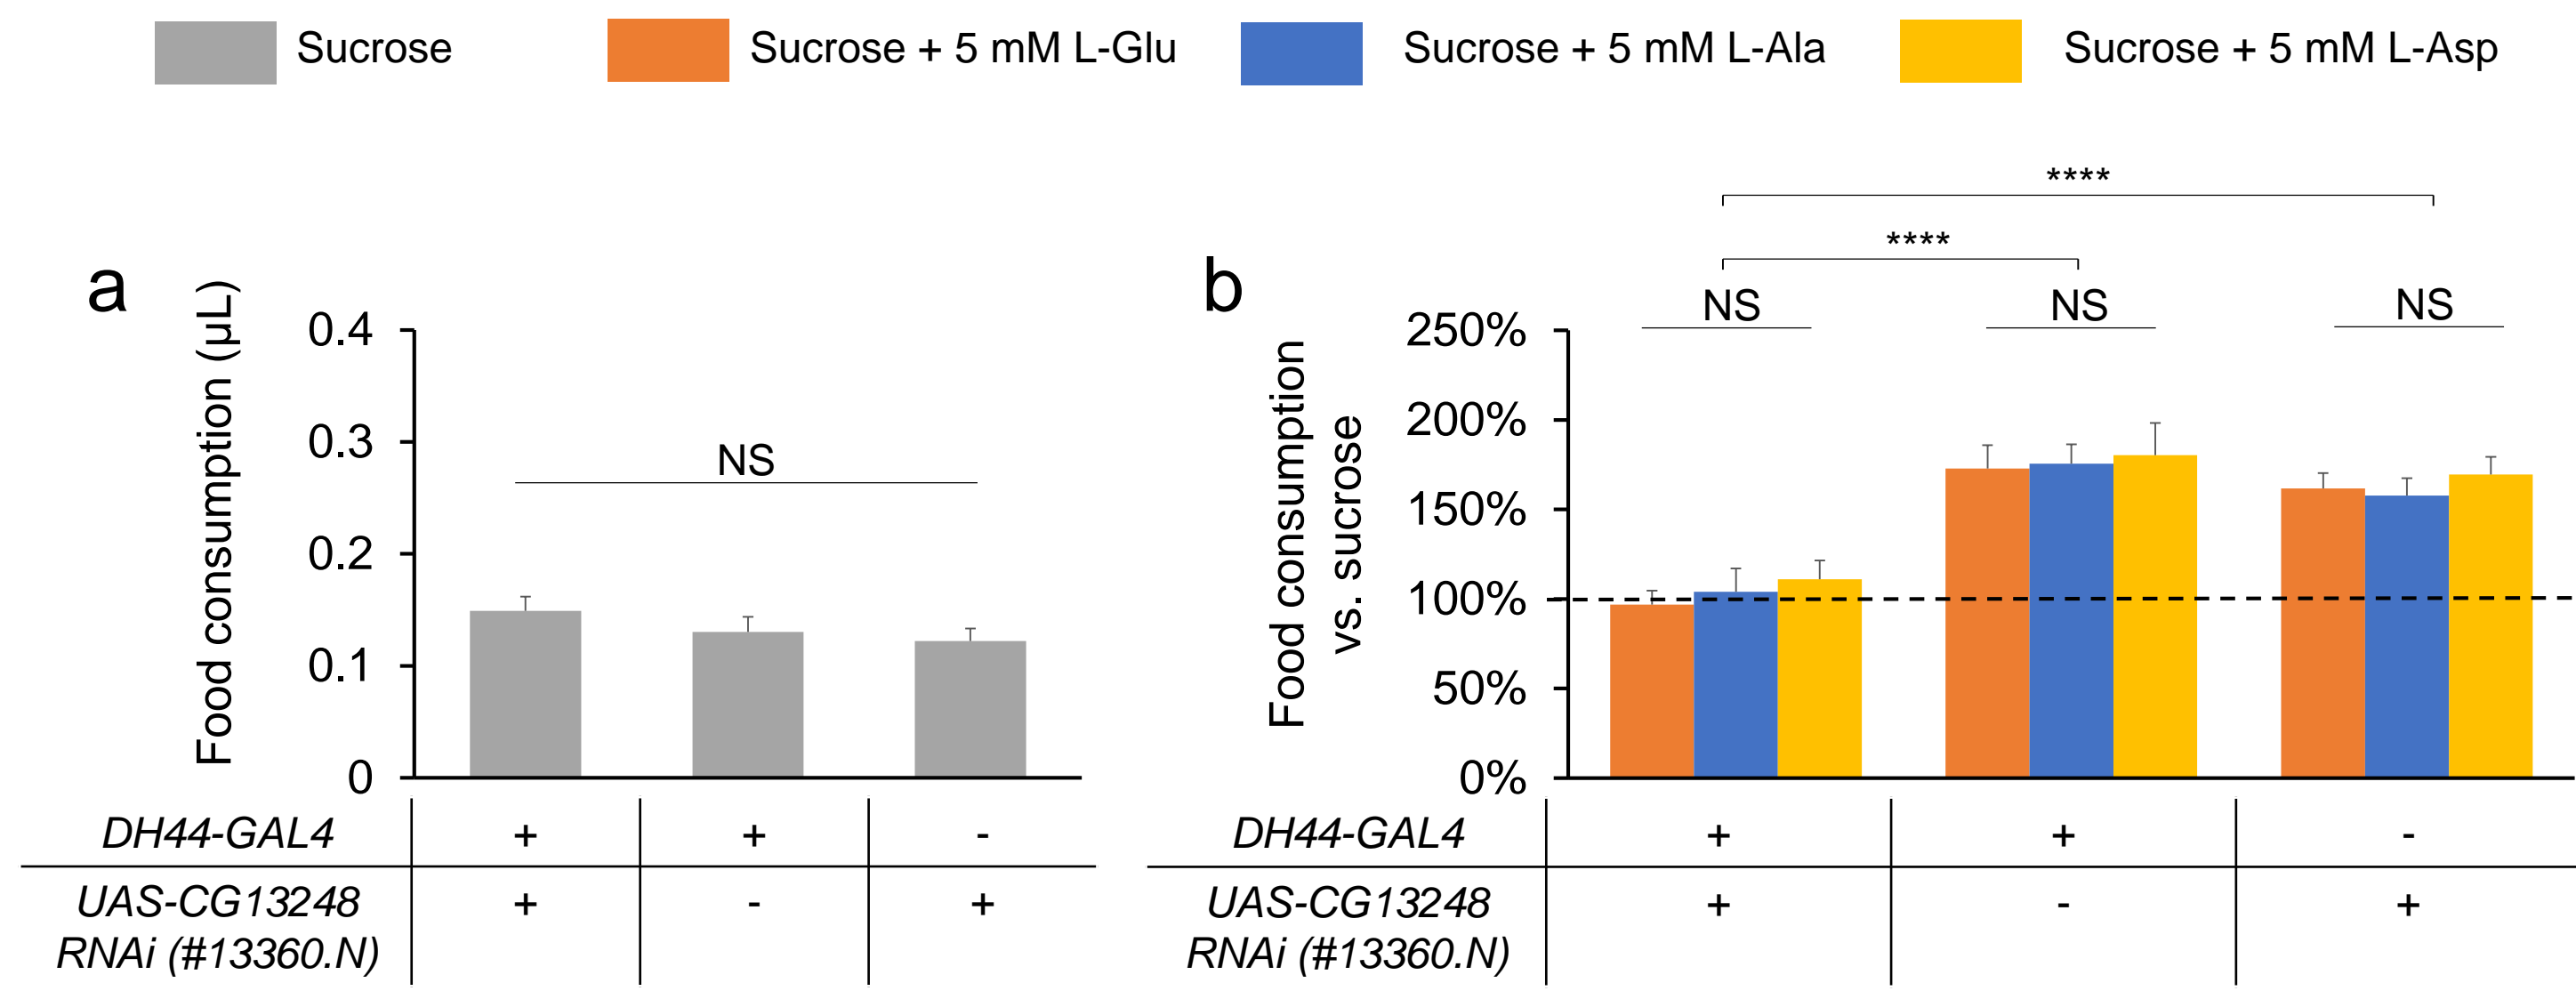

**Figure S11. CG13248 is required for the increase in food consumption by dietary amino acids.**

(a) Volume of 400 mM sucrose consumed by indicated genotypes (n=21-22). (b)

Changes in food consumption by the addition of 5 mM of indicated amino acid compared to 400 mM sucrose alone (dotted line) (n=21-22). Virgin females were used for all experiments shown in this figure. Data are shown as means ( $\pm$  SEM). NS,  $P > 0.05$ ;

\* $P < 0.05$ ; \*\* $P < 0.01$ ; \*\*\* $P < 0.001$ ; \*\*\*\* $P < 0.0001$ .
