# Supplementary material for: A post-ingestive amino acid sensor promotes food consumption in Drosophila
Source: PubMed Central journal article supplement (PMC6170445; doi:10.1038/s41422-018-0084-9), 2018-09-12
Supplement: 41422_2018_84_MOESM12_ESM.pdf [file 41422_2018_84_MOESM12_ESM.pdf]

Figure S12

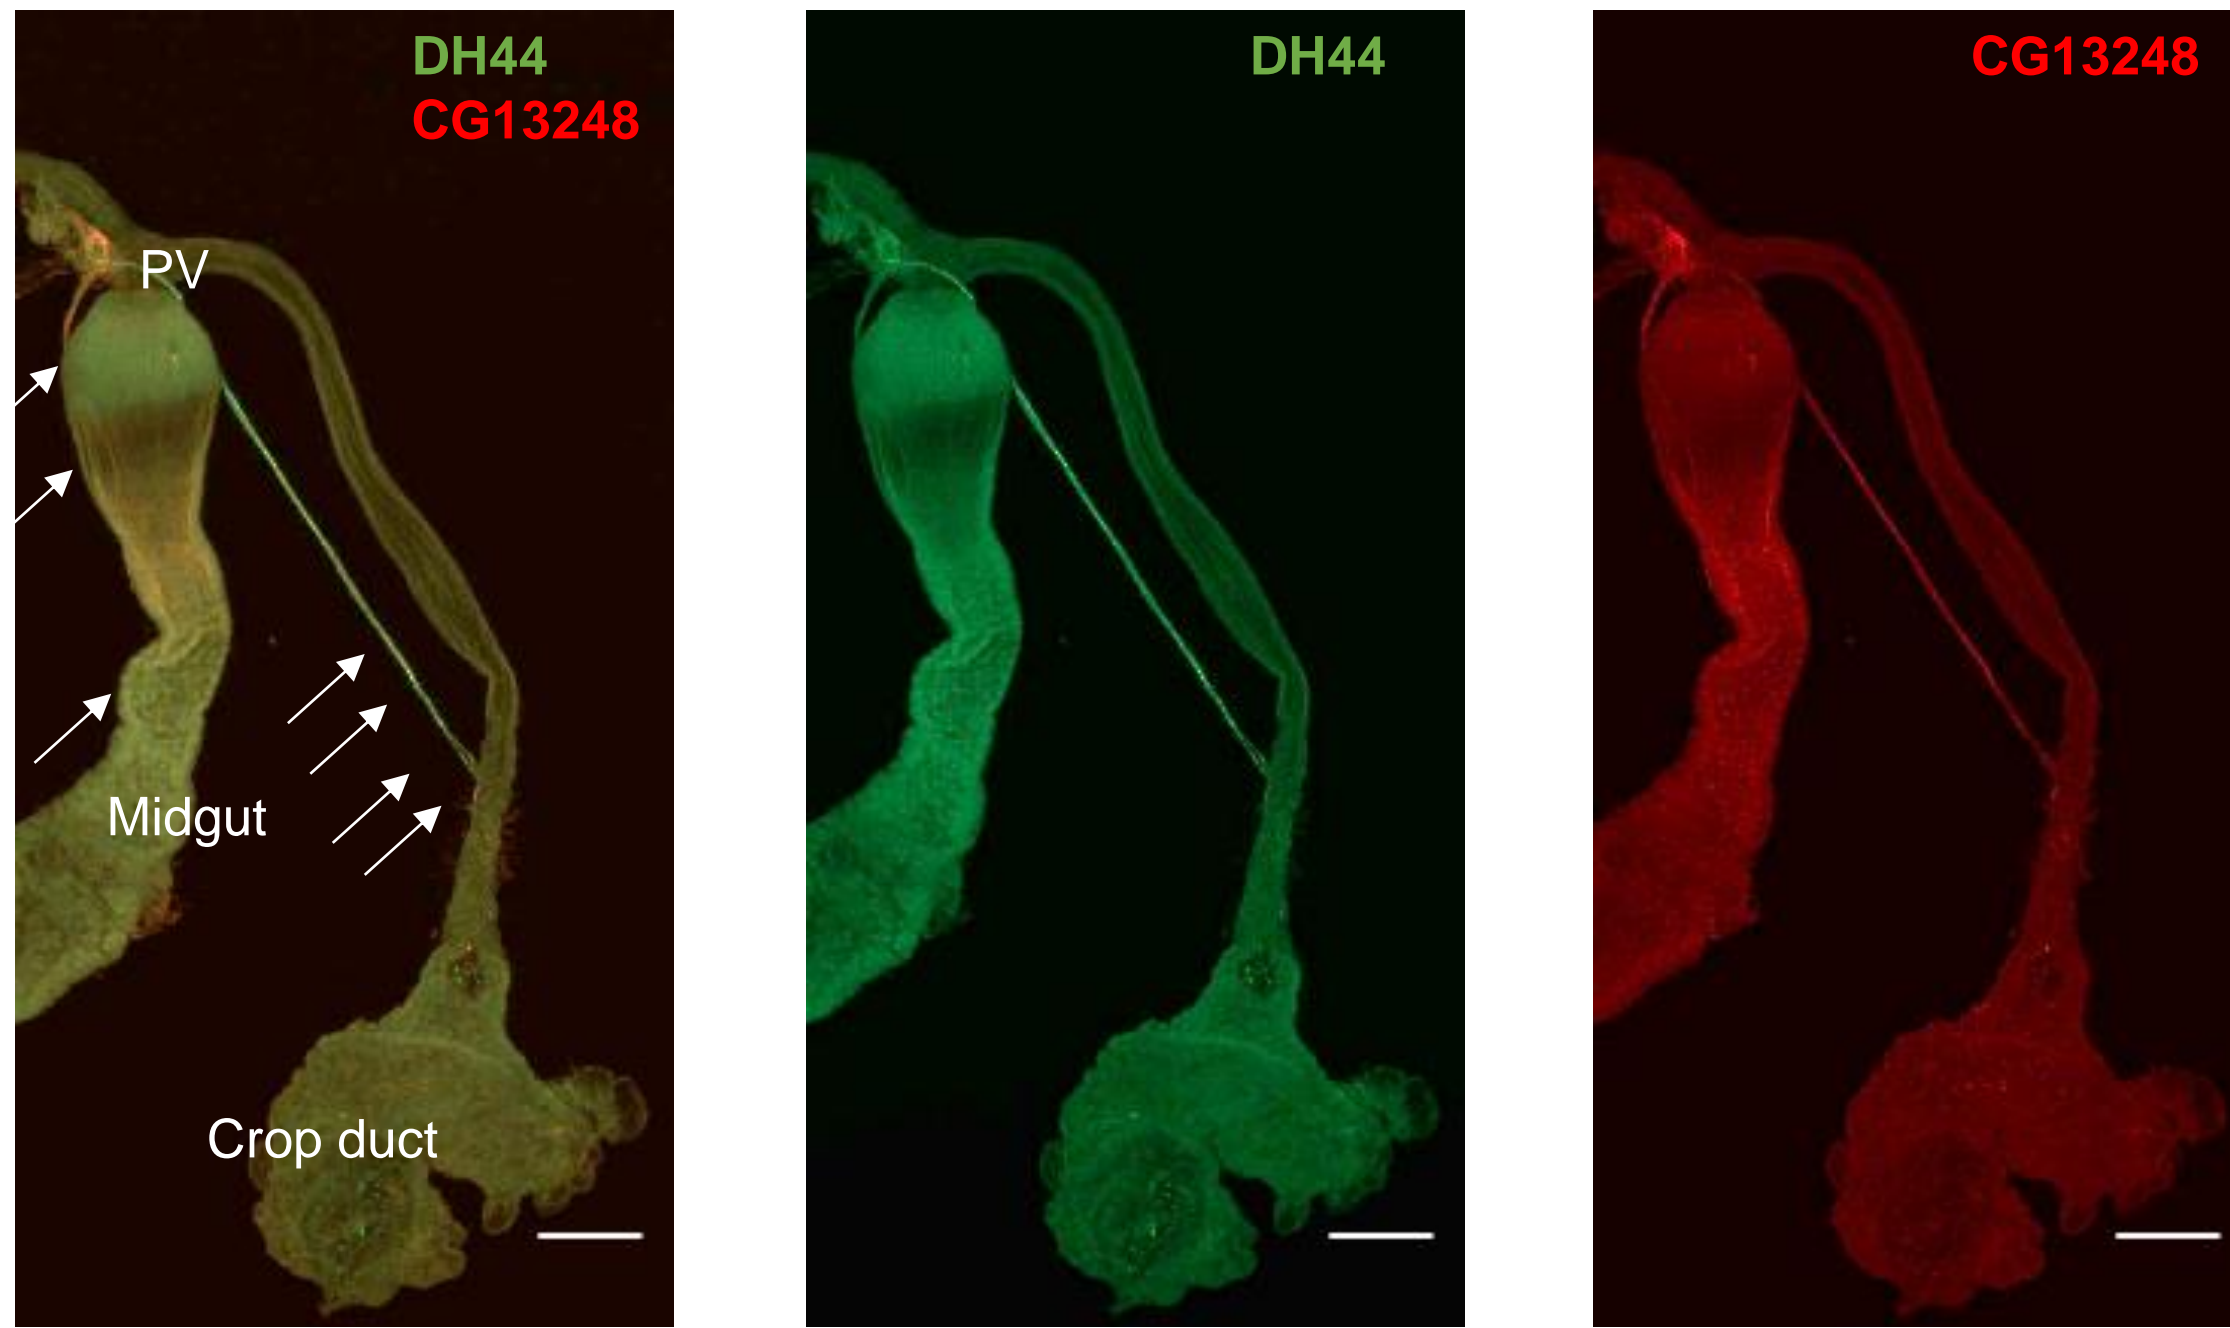

**Figure S12. CG13248 is expressed in DH44<sup>+</sup> neural terminals in the gut.**

As visualized by the antibody, CG13248 (red) is expressed in the DH44<sup>+</sup> neural terminals (green) in the gut, innervating both the crop duct and the midgut (arrows). The scale bar represents 50  $\mu\text{m}$ . Virgin females were used for all experiments shown in this figure.
