# Supplementary material for: A post-ingestive amino acid sensor promotes food consumption in Drosophila
Source: PubMed Central journal article supplement (PMC6170445; doi:10.1038/s41422-018-0084-9), 2018-09-12
Supplement: 41422_2018_84_MOESM13_ESM.pdf [file 41422_2018_84_MOESM13_ESM.pdf]

Figure S13

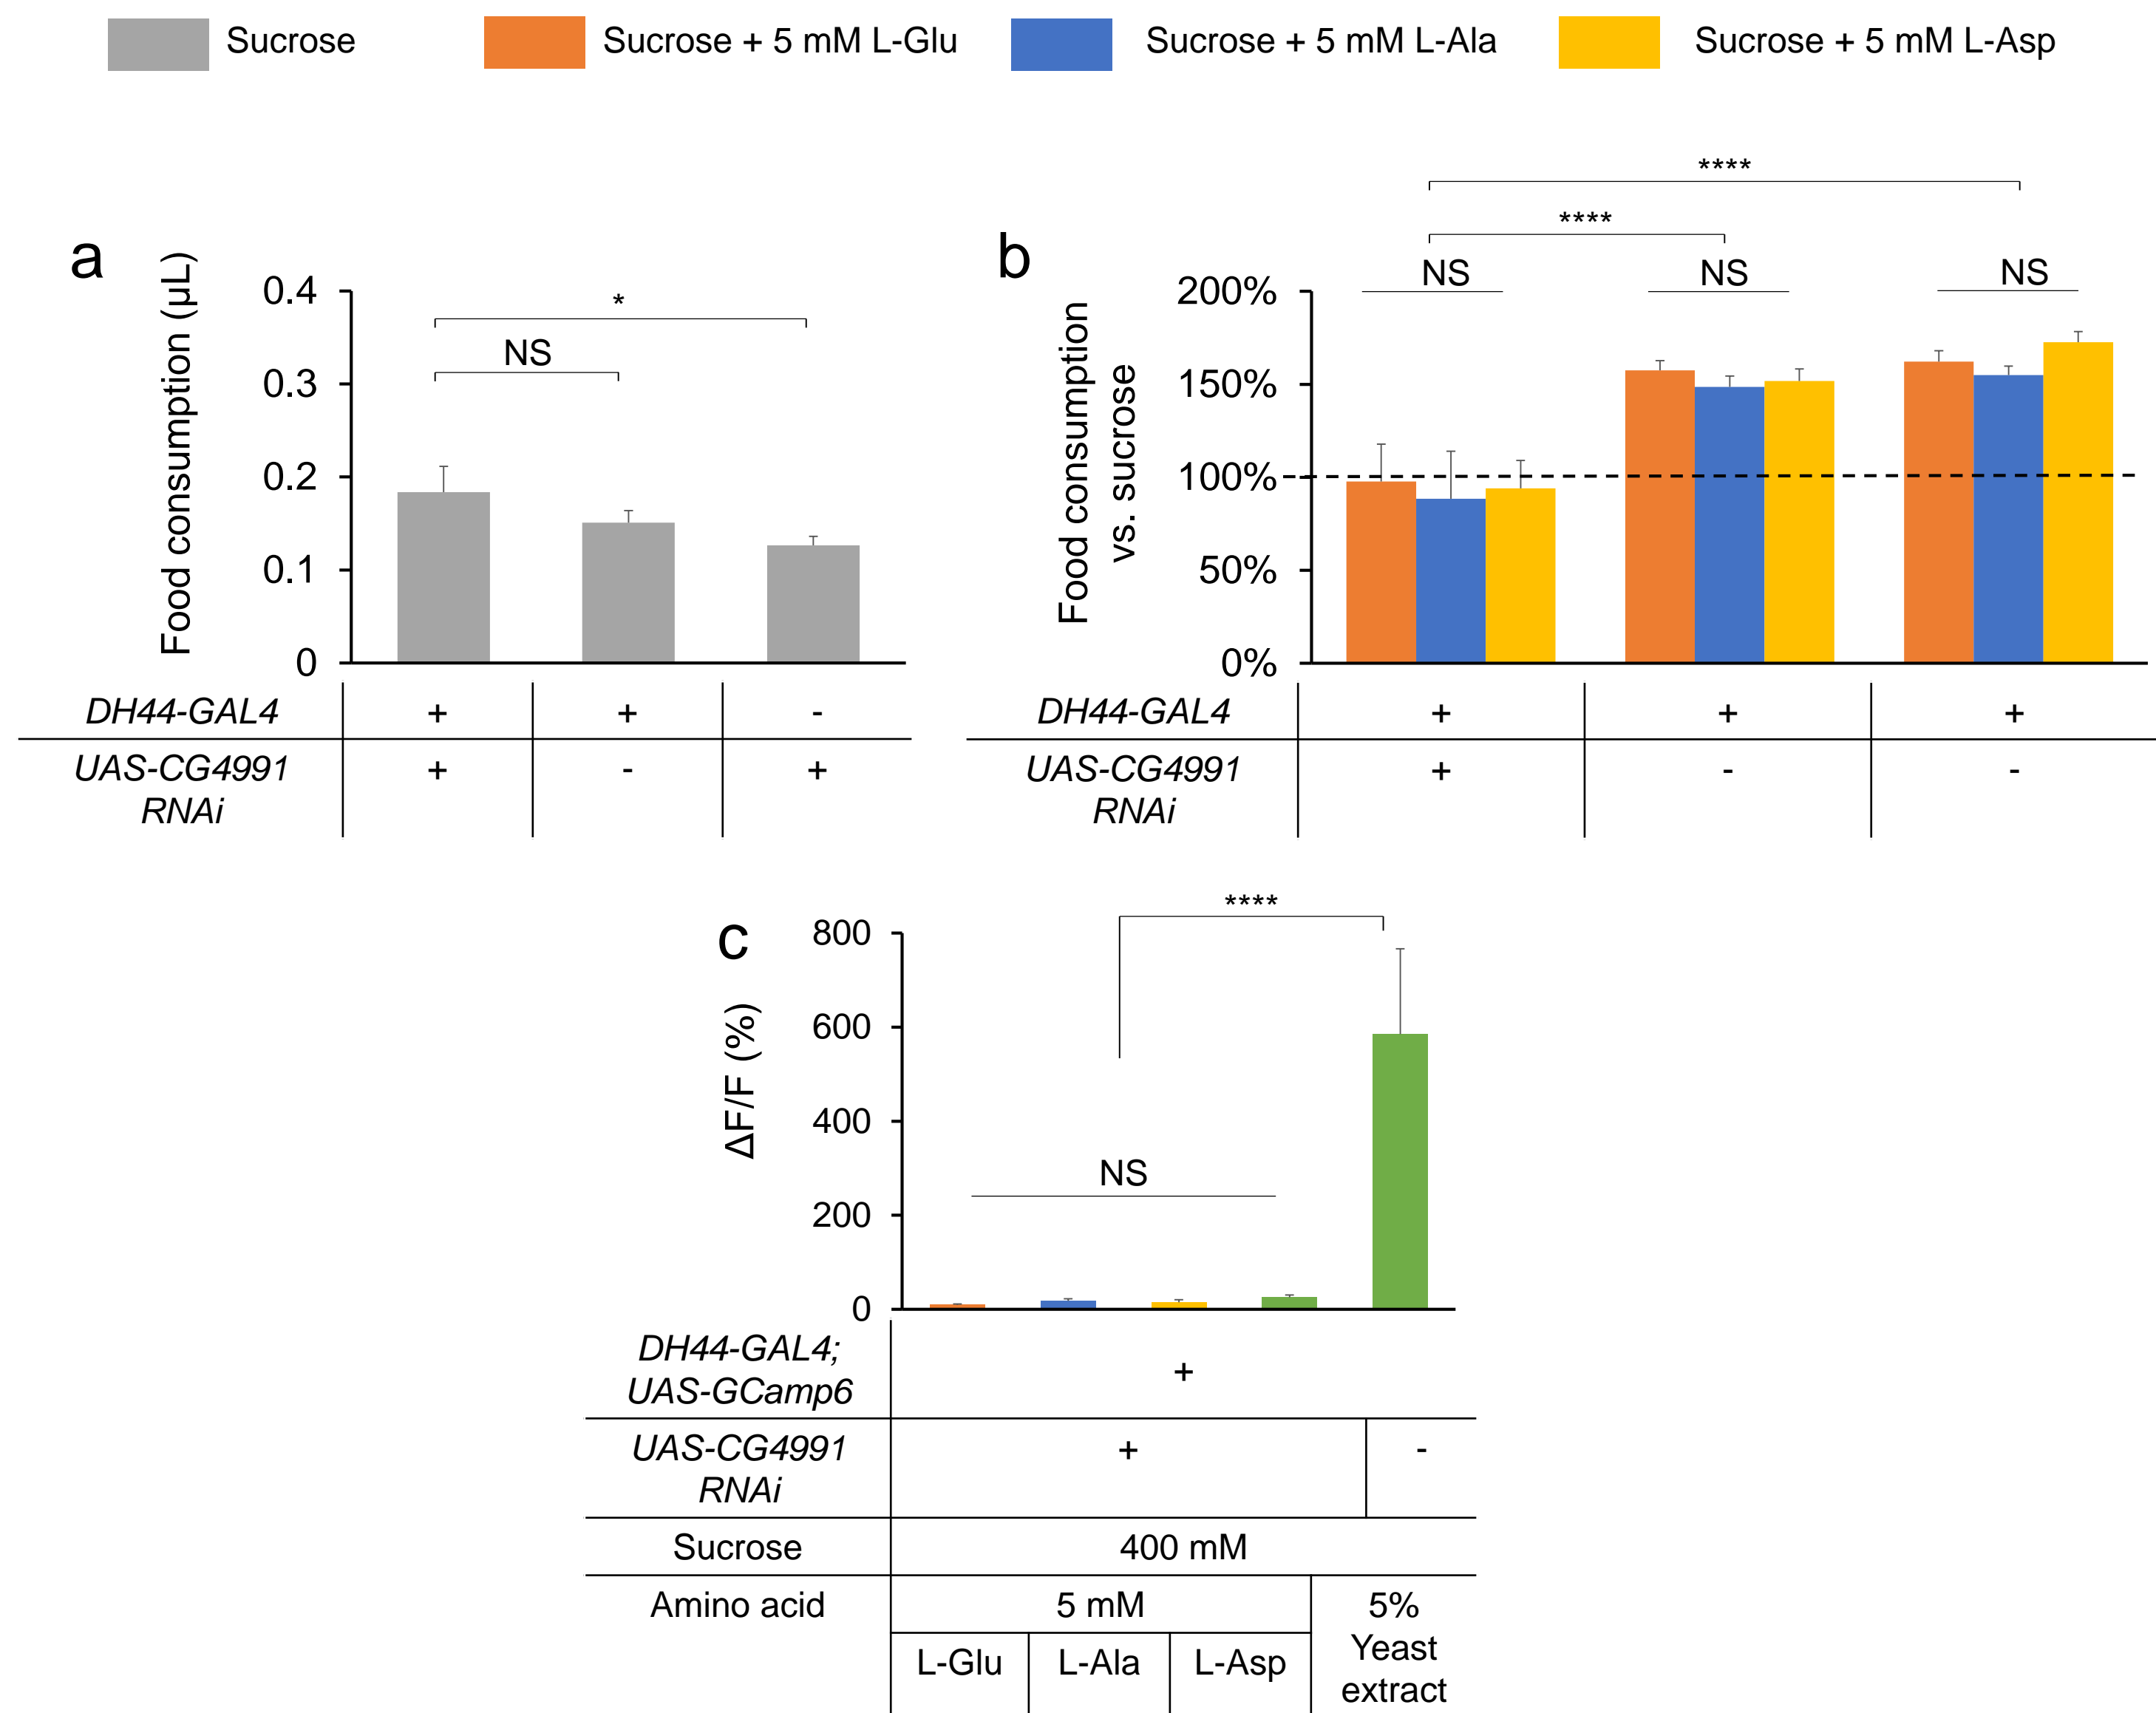

**Figure S13. CG4991 is required for the increase in food consumption by dietary amino acids.**

(a) Volume of 400 mM sucrose consumed by indicated genotypes (n=19-28). (b)

Changes in food consumption by the addition of 5 mM of indicated amino acid compared to 400 mM sucrose alone (dotted line) (n=18-30). (c) Quantification of *in vivo* calcium

response of DH44<sup>+</sup> neurons to different food of indicated genotypes (n=8-11). Virgin

females were used for all experiments shown in this figure. Data are shown as means ( $\pm$

SEM). NS,  $P > 0.05$ ; \* $P < 0.05$ ; \*\* $P < 0.01$ ; \*\*\* $P < 0.001$ ; \*\*\*\* $P < 0.0001$ .
