# Supplementary material for: A post-ingestive amino acid sensor promotes food consumption in Drosophila
Source: PubMed Central journal article supplement (PMC6170445; doi:10.1038/s41422-018-0084-9), 2018-09-12
Supplement: 41422_2018_84_MOESM14_ESM.pdf [file 41422_2018_84_MOESM14_ESM.pdf]

**Figure S14. DH44<sup>+</sup> neurons do not express functional glutamate receptors.**

FPKM of putative glutamate transporter genes expressed in DH44<sup>+</sup> neurons as detected by single-cell RNAseq. Virgin females were used for all experiments shown in this figure.
