# Supplementary material for: A post-ingestive amino acid sensor promotes food consumption in Drosophila
Source: PubMed Central journal article supplement (PMC6170445; doi:10.1038/s41422-018-0084-9), 2018-09-12
Supplement: 41422_2018_84_MOESM16_ESM.pdf [file 41422_2018_84_MOESM16_ESM.pdf]

**Table S1. Composition of amino acid mixture (5 mM)**

| L-amino acid  | Biological available nitrogen (mM) | Biological available nitrogen (%) |
|---------------|------------------------------------|-----------------------------------|
| arginine      | 0.391                              | 7.82                              |
| histidine     | 0.258                              | 5.15                              |
| isoleucine    | 0.248                              | 4.96                              |
| leucine       | 0.353                              | 7.06                              |
| lysine        | 0.267                              | 5.34                              |
| methionine    | 0.007                              | 1.34                              |
| phenylalanine | 0.153                              | 3.05                              |
| threonine     | 0.296                              | 5.92                              |
| tryptophan    | 0.038                              | 0.76                              |
| valine        | 0.324                              | 6.54                              |
| alanine       | 0.429                              | 8.59                              |
| asparagine    | 0.391                              | 7.82                              |
| aspartate     | 0.162                              | 3.24                              |
| cysteine      | 0.006                              | 0.11                              |
| glutamate     | 0.277                              | 5.53                              |
| glutamine     | 0.553                              | 11.07                             |
| glycine       | 0.305                              | 6.11                              |
| proline       | 0.162                              | 3.24                              |
| serine        | 0.267                              | 5.34                              |
| tyrosine      | 0.067                              | 1.34                              |

Note the concentrations of amino acids in the mixture usually equals to nitrogen concentrations except that for arginine, histidine, asparagine, and glutamine, their concentrations in the mixture are 50% of nitrogen concentrations.

**Table S1. Composition of amino acid mixture**

Concentrations of each of the 20 L-amino acids in 5 mM amino acid mixture.
